# Supplementary material for: Acridinone-based anion receptors and sensors
Source: Royal Society of Chemistry journal article supplement (doi:10.1039/b618072h), 2007-01-01
Supplement: b618072h.pdf [file b618072h.pdf]

## Acridinone-based anion receptors and sensors

**Sergio E. García-Garrido, Claudia Caltagirone, Mark E. Light and Philip A. Gale\***

*School of Chemistry, University of Southampton, Southampton, UK SO17 1BJ.*

*Fax: +44 23 8059 6805; Tel: +44 23 8059 3332;*

*E-mail: [Philip.gale@soton.ac.uk](mailto:Philip.gale@soton.ac.uk)*

### Supplementary information

#### *Experimental procedures:*

All reactions were performed in oven-dried glassware under a slight positive pressure of nitrogen.  $^1\text{H}$  NMR (300 MHz) and  $^{13}\text{C}$  NMR (75 MHz) spectra were determined on a Bruker AV300. Chemical shifts for  $^1\text{H}$  NMR are reported in parts per million, calibrated to the residual solvent peak set, with coupling constants reported in Hertz (Hz). The following abbreviations are used for spin multiplicity: s = singlet, d = doublet, t = triplet, m = multiplet and br = broad. Chemical shifts for  $^{13}\text{C}$  NMR are reported in ppm, relative to the central line of a septet at 39.52 ppm for deuterio-dimethylsulfoxide. Deuterated solvents were purchased from Apollo Ltd. ES MS were measured on Micromass Mattro II instrument. Infrared (IR) spectra were recorded on a Mattson Satellite (ATR) FTIR and are reported in wavenumbers ( $\text{cm}^{-1}$ ). Uv-vis absorbance spectra were recorded on a Hitachi U-2001 spectrophotometer with fluorescence emission spectra recorded on a Hitachi F-2000 spectrofluorimeter with a 150W Xenon lamp. The photomultiplier voltage was set to 400V with excitation and emission slits set to 2.5 mm. Melting points were measured on a Gallenkamp melting point apparatus. Elemental analyses were performed by Medac Ltd.

#### **4,5-dibenzamido-9(10H)-acridinone (2):**

4,5-Diamino-9(10H)-acridinone (**1**, 0.2 g, 0.888 mmol) was placed in a dry round bottomed flask under  $\text{N}_2$  atmosphere and 100 mL of pyridine was added. The mixture was heated at 100  $^\circ\text{C}$  for 5 min. and then a second solution of benzoyl chloride (0.31 mL, 2.64 mmol) in 50 mL of DMF was added dropwise over the course of 3 hours. The dark yellow solution was heated

at reflux for 1 hour and then filtered. The solution was concentrated *in vacuo* and 20 mL of boiling water was added to the resulting residue. The obtained precipitate was filtered, washed with water (3 x 10 mL) and dried to obtain a yellow-brown solid which was washed with 100 mL of a 1.0 M NaOH solution in water and filtered. This solid was washed with MeOH (3 x 20 mL) and filtered again to obtain a dark yellow powder which was dried under vacuum overnight (0.188 g, 49% yield); mp>300°C; <sup>1</sup>H NMR: (300 MHz, DMSO, δ): 10.56 (s, 2H, NH), 9.79 (s, 1H, acridinone NH), 8.24 (d, *J* = 9.0 Hz, 2H, Ar. H), 7.85 (m, 6H, Ar. H), 7.59 (t, *J* = 7.2 Hz, 2H, Ar. H), 7.37 (m, 6H, Ar. H); <sup>13</sup>C NMR: (75 MHz, DMSO, δ): 175.3 (C), 164.5 (C), 141.1 (C), 135.2 (C), 131.9 (C), 131.3 (CH), 128.7 (CH), 126.9 (CH), 121.7 (C), 120.6 (CH), 117.8 (CH), 116.8 (CH); LRMS (ES<sup>-</sup>): 432.3 (M-H), 865.4 (2M-H); IR (film, cm<sup>-1</sup>): 3363, 3324, 3050, 1684, 1674, 1623, 1599, 1583, 1543, 1506, 1486, 1433, 1339, 1276, 1258, 1222, 746, 703, 684, 608; Elemental analysis calcd (%) for C<sub>27</sub>H<sub>19</sub>N<sub>3</sub>O<sub>3</sub>: C: 74.81; H: 4.42; N: 9.69. Found C: 74.92; H: 4.40; N: 9.61.

### **4,5-bis(N-phenylureido)-9(10H)-acridinone (3):**

4,5-Diamino-9(10H)-acridinone (**1**, 0.2 g, 0.888 mmol) was placed in a dry round bottomed flask under N<sub>2</sub> atmosphere and 50 mL of DMF was added. To this was then added a second solution of phenylisocyanate (1.99 mL, 17.76 mmol) in 10 mL of DMF and the mixture was stirred for 1 hour. The yellow solution was then evaporated *in vacuo* and the resulting residue was treated with a mixture of diethyl ether/hexane (1:1) (100 mL), filtered and washed with diethyl ether (3 x 20 mL) and MeOH (3 x 20 mL) to obtain a yellow solid which was dried under vacuum overnight (0.362 g, 88% yield); mp>300°C; <sup>1</sup>H NMR (300MHz, DMSO, δ): 10.65 (s, 1H, acridinone NH), 8.89 (s, 2H, NH), 8.73 (s, 2H, NH), 8.12 (d, *J* = 7.9 Hz, 2H, Ar. H), 7.68 (d, *J* = 7.2 Hz, 2H, Ar. H), 7.42 (d, *J* = 7.9 Hz, 4H, Ar. H), 7.30 (t, *J* = 7.6 Hz, 2H, Ar. H), 7.14 (t, *J* = 7.6 Hz, 4H, Ar. H), 6.94 (t, *J* = 7.2 Hz, 2H, Ar. H); <sup>13</sup>C NMR (75MHz, DMSO, δ): 176.9 (C), 153.9 (C), 139.4 (C), 135.6 (C), 129.2 (CH), 128.6 (CH), 127.1 (C), 122.7 (CH), 122.0 (CH), 121.5 (C), 121.1 (CH), 118.6 (CH); LRMS (ES<sup>-</sup>): 462.3 (M-H),

926.3 (2M-H); IR (film,  $\text{cm}^{-1}$ ): 3393, 3281, 3053, 1636, 1622, 1596, 1553, 1516, 1497, 1441, 1330, 1314, 1215, 754, 692; Elemental analysis calcd (%) for  $\text{C}_{27}\text{H}_{21}\text{N}_5\text{O}_3$ : C: 69.97; H: 4.57; N: 15.10. Found C: 69.82; H: 4.48; N: 15.12.

#### **4,5-bis(N-phenylthioureido)-9(10H)-acridinone (4):**

4,5-Diamino-9(10H)-acridinone (**1**, 0.2 g, 0.888 mmol) was placed in a dry round bottomed flask under  $\text{N}_2$  atmosphere and 50 mL of DMF was added. To this was then added a second solution of phenylisothiocyanate (2.17 mL, 17.76 mmol) in 10 mL of DMF and the mixture left stirring for 3 hours. The yellow solution was then evaporated *in vacuo* and the resulting residue was treated with a mixture of diethyl ether/hexane (1:1) (100 mL), filtered and washed with diethyl ether (3 x 20 mL) and MeOH (3 x 20 mL) to obtain a yellow solid which was dried under vacuum overnight (0.370 g, 84% yield); mp > 300°C;  $^1\text{H}$  NMR: (300 MHz, DMSO,  $\delta$ ): 10.07 (s, 2H, NH), 9.75 (s, 2H, NH), 9.19 (s, 1H, acridinone NH), 8.19 (d,  $J = 8.0$  Hz, 2H, Ar. H), 7.66 (d,  $J = 7.7$  Hz, 2H, Ar. H), 7.51 (d,  $J = 8.0$  Hz, 4H, Ar. H), 7.28 (m, 6H, Ar. H), 7.13 (t,  $J = 7.3$  Hz, 2H, Ar. H);  $^{13}\text{C}$  NMR (75MHz, DMSO,  $\delta$ ): 181.4 (C), 176.9 (C), 139.0 (C), 136.7 (C), 133.0 (CH), 128.4 (CH), 127.6 (C), 124.9 (CH), 124.6 (CH), 124.5 (CH), 121.3 (C), 121.1 (CH); LRMS ( $\text{ES}^-$ ): 494.2 (M-H), 989.3 (2M-H); IR (film,  $\text{cm}^{-1}$ ): 3291, 3204, 3025, 1619, 1581, 1542, 1522, 1496, 1439, 1344, 1320, 1278, 1217, 746, 722, 690, 647; Elemental analysis calcd (%) for  $\text{C}_{27}\text{H}_{21}\text{N}_5\text{S}_2\text{O}$ : C: 65.43; H: 4.27; N: 14.13. Found C: 65.31; H: 4.46; N: 14.07.

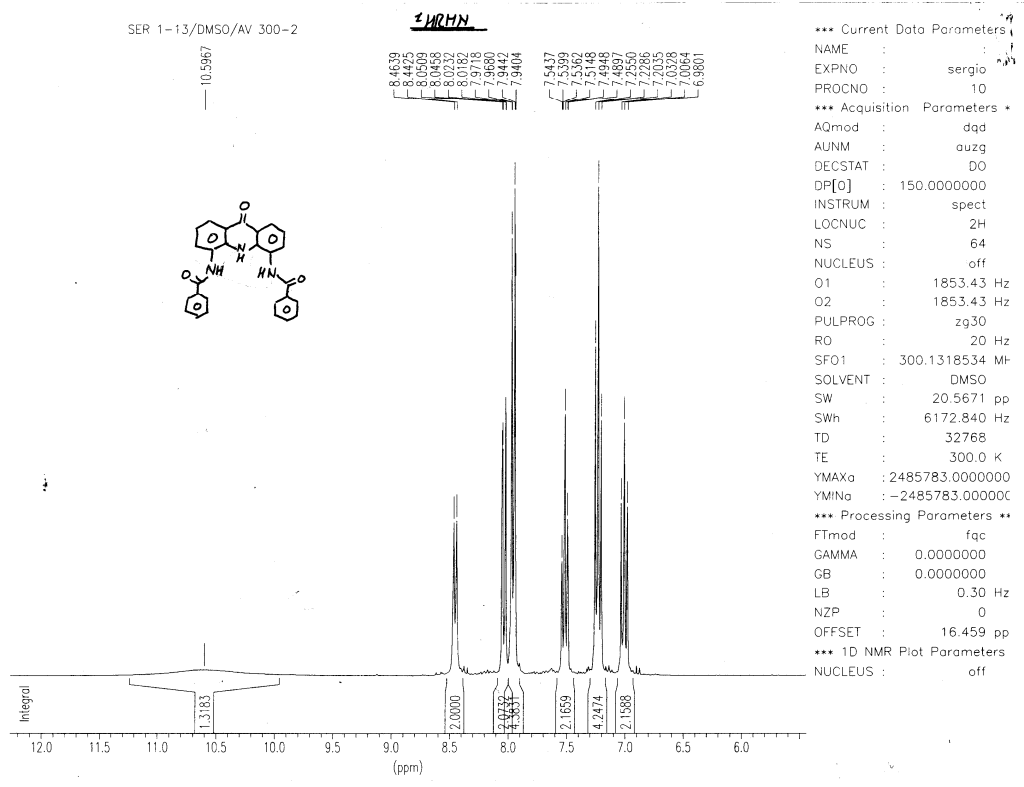

Figure S1 <sup>1</sup>H NMR spectrum of compound 2 in DMSO-d<sub>6</sub>

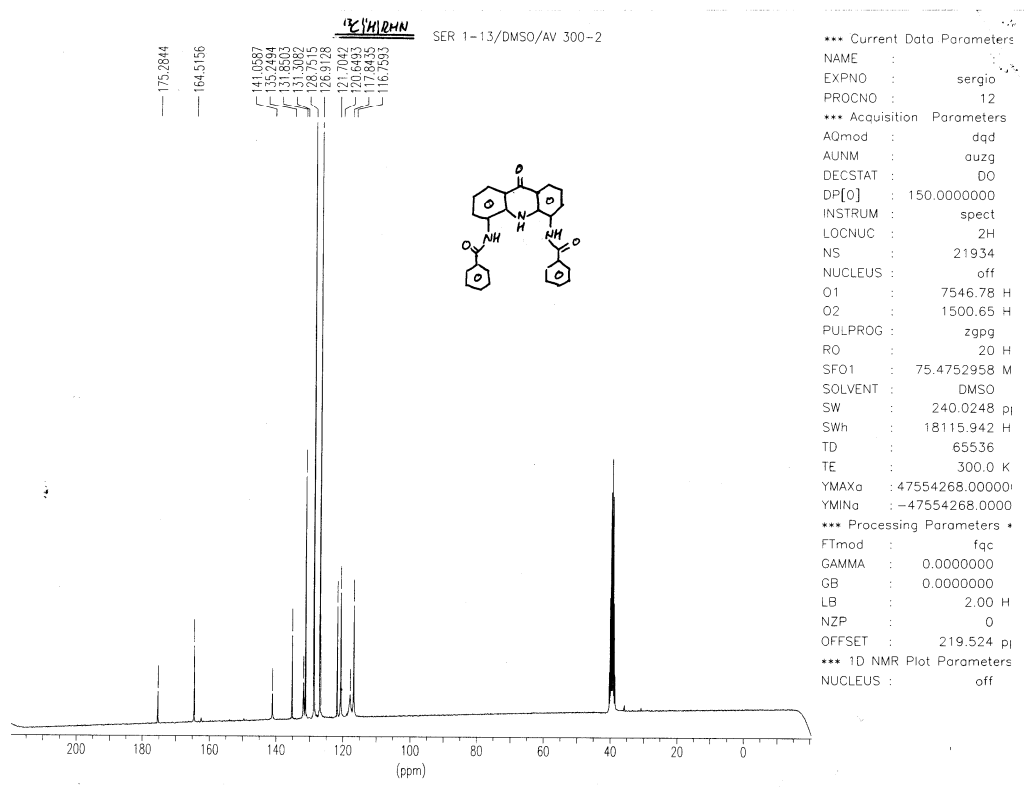

Figure S2 <sup>13</sup>C{<sup>1</sup>H} NMR spectrum of compound 2 in DMSO-d<sub>6</sub>

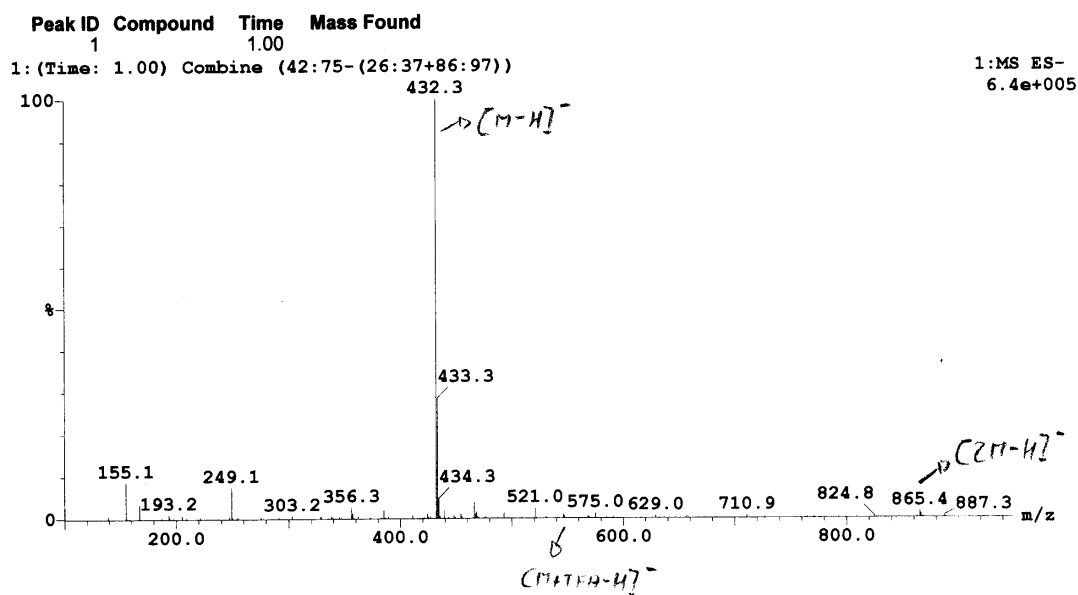

Figure S3 ESMS (-ve) of compound 2

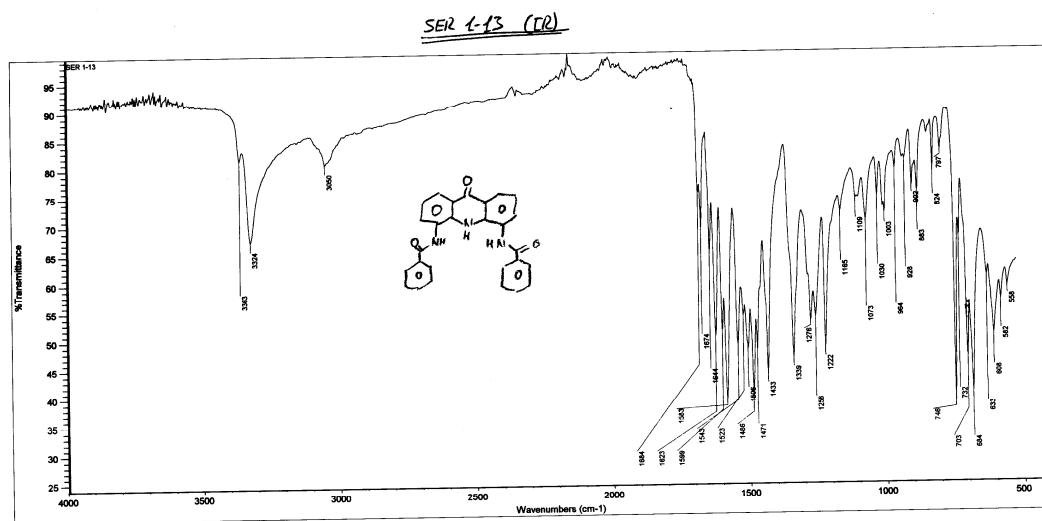

Thu Nov 16 11:07:10 2006 (GMT+00:00)

FIND PEAKS: SER 1-13

Spectrum: 4000 400

Region: 4000 400

Absolute threshold: 82.756

Sensitivity: 57

| Position | Intensity |
|----------|-----------|
| 558      | 58.367    |
| 582      | 55.984    |
| 808      | 46.927    |
| 833      | 80.117    |
| 884      | 39.630    |
| 703      | 45.894    |
| 732      | 66.879    |
| 748      | 37.830    |
| 797      | 82.038    |
| 824      | 78.377    |
| 883      | 74.823    |
| 902      | 75.512    |
| 928      | 80.539    |
| 984      | 78.837    |
| 1003     | 70.828    |

Figure S4 IR spectrum of compound 2



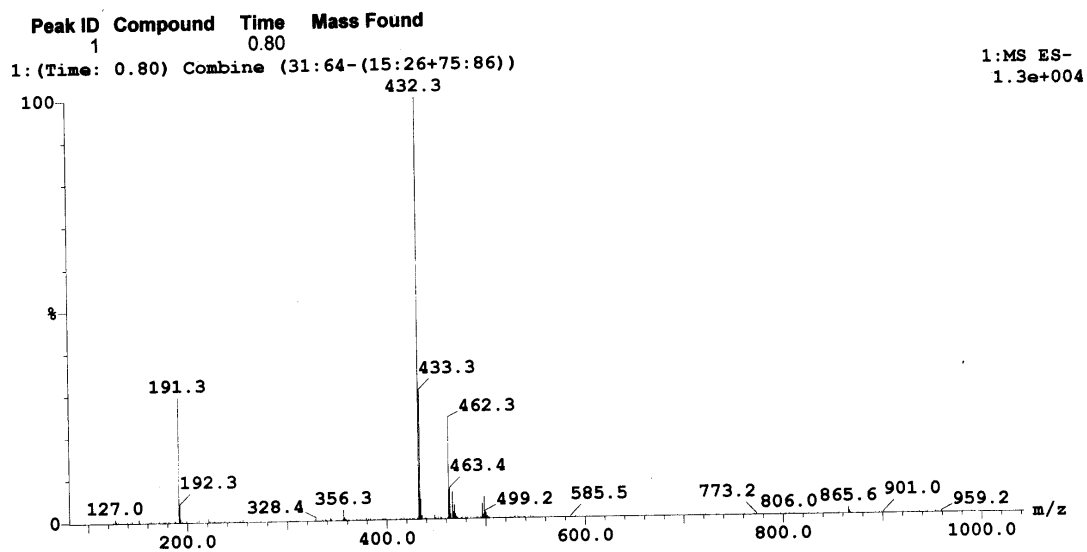

Figure S7 ESMS (-ve) of compound 3

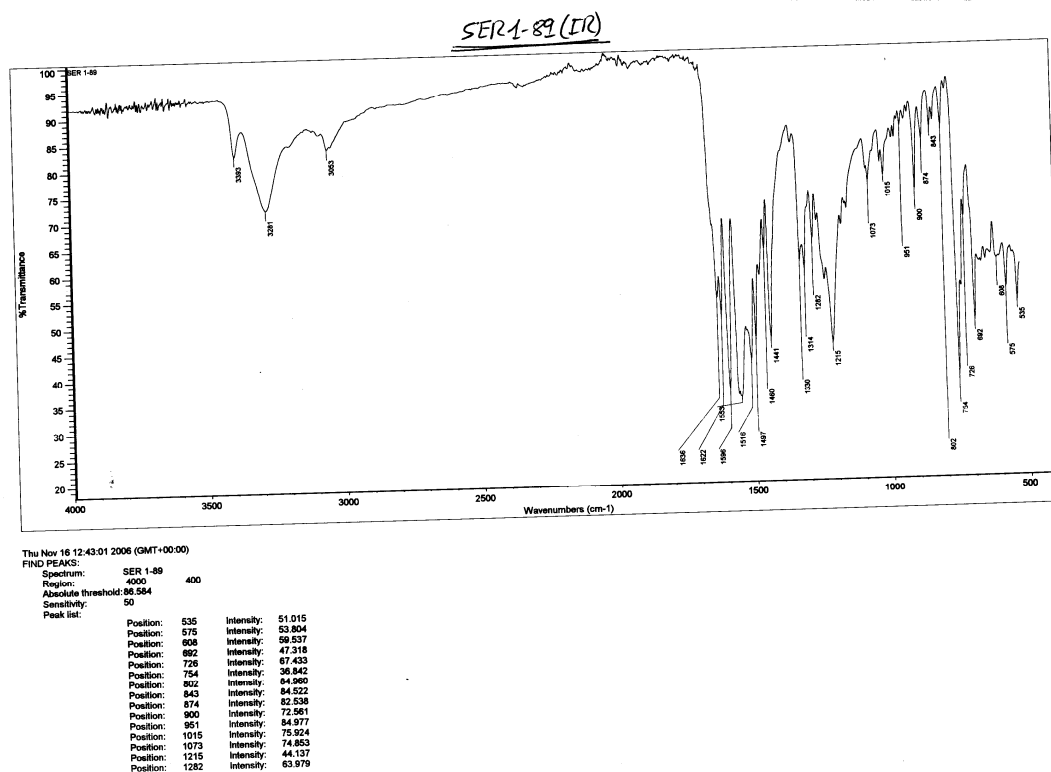

Figure S8 IR spectrum of compound 3

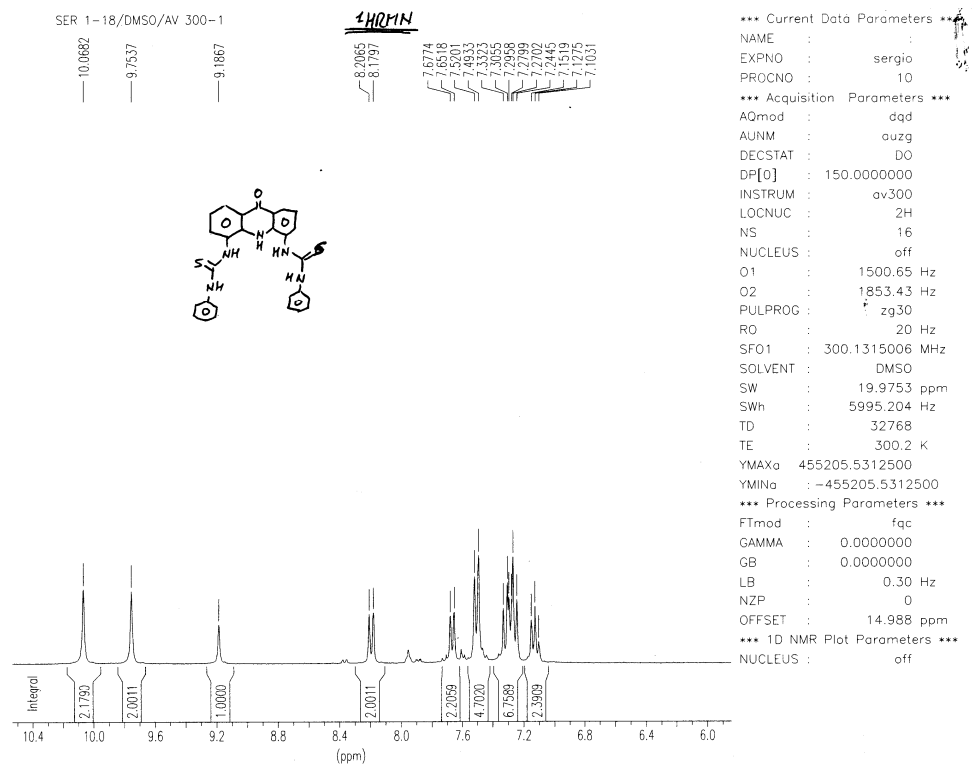

Figure S9 <sup>1</sup>H NMR spectrum of compound 4 in DMSO-d<sub>6</sub>

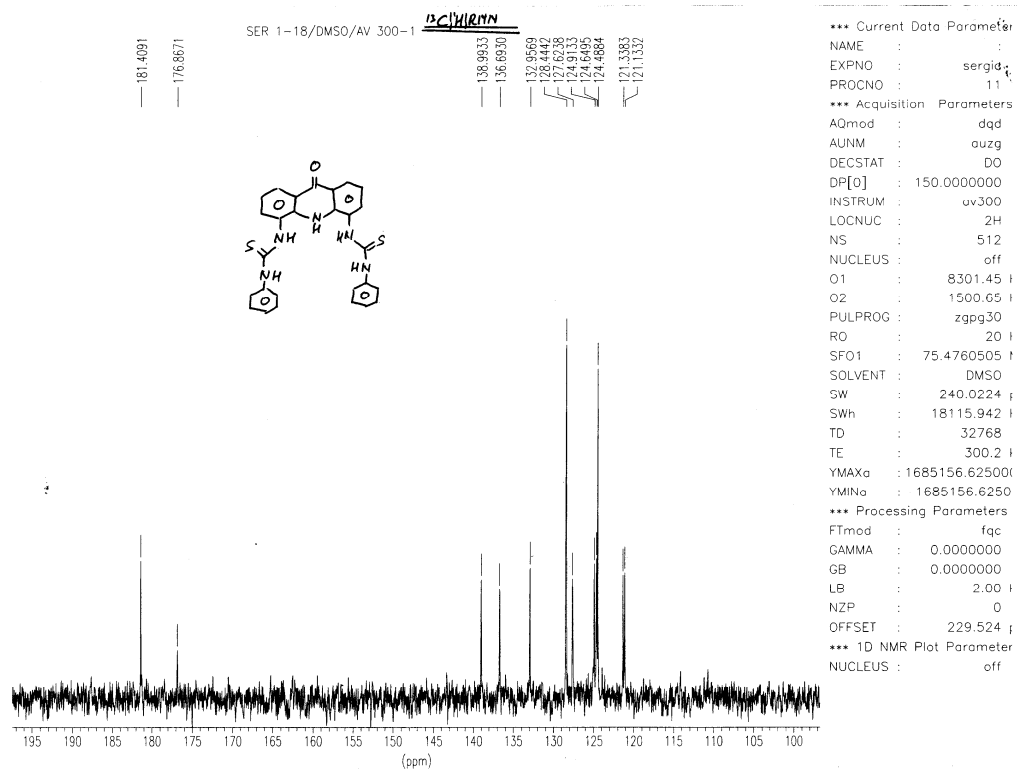

Figure S10 <sup>13</sup>C{<sup>1</sup>H} NMR spectrum of compound 4 in DMSO-d<sub>6</sub>



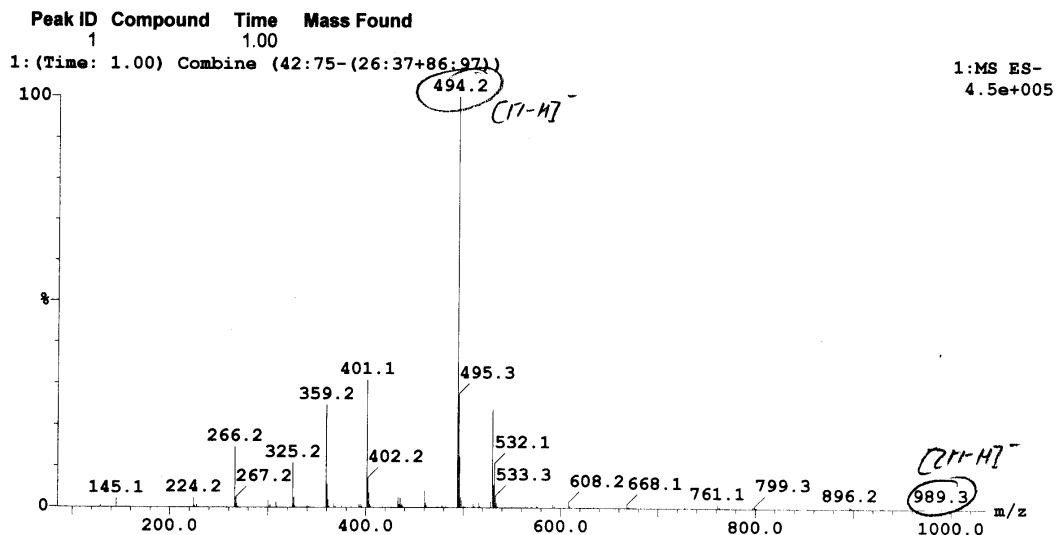

Figure S11 ESMS (-ve) of compound 4

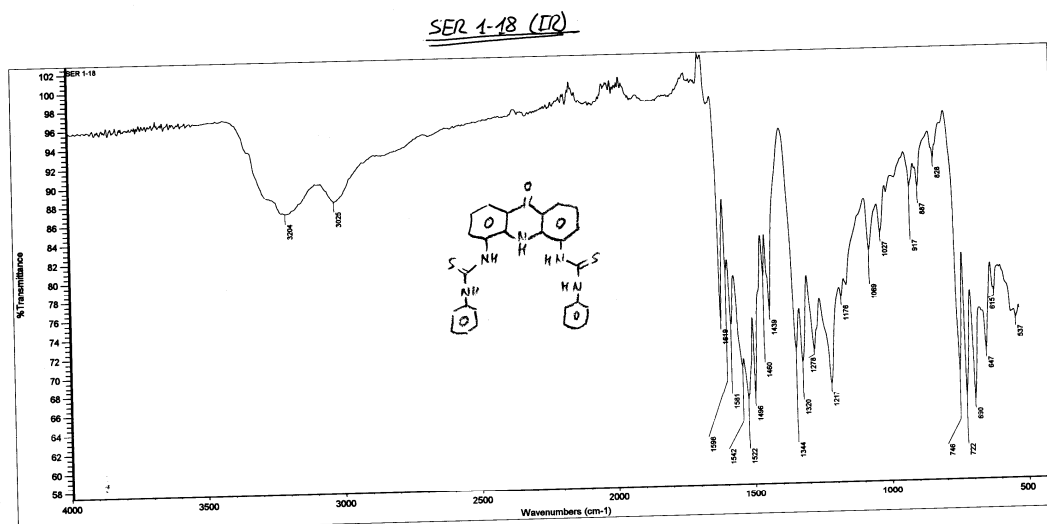

Thu Nov 16 11:14:36 2006 (GMT+00:00)

FIND PEAKS:  
Spectrum: SER 1-18  
Region: 4000 400  
Absolute threshold: 91.892  
Sensitivity: 60

Peak list:

| Position | Intensity |
|----------|-----------|
| 537      | 74.189    |
| 615      | 77.183    |
| 647      | 71.002    |
| 690      | 65.852    |
| 722      | 66.213    |
| 746      | 68.763    |
| 828      | 91.130    |
| 887      | 85.274    |
| 917      | 86.268    |
| 1027     | 83.459    |
| 1089     | 81.879    |
| 1176     | 76.826    |
| 1217     | 87.791    |
| 1218     | 71.320    |
| 1320     | 70.074    |

Figure S12 IR spectrum of compound 4

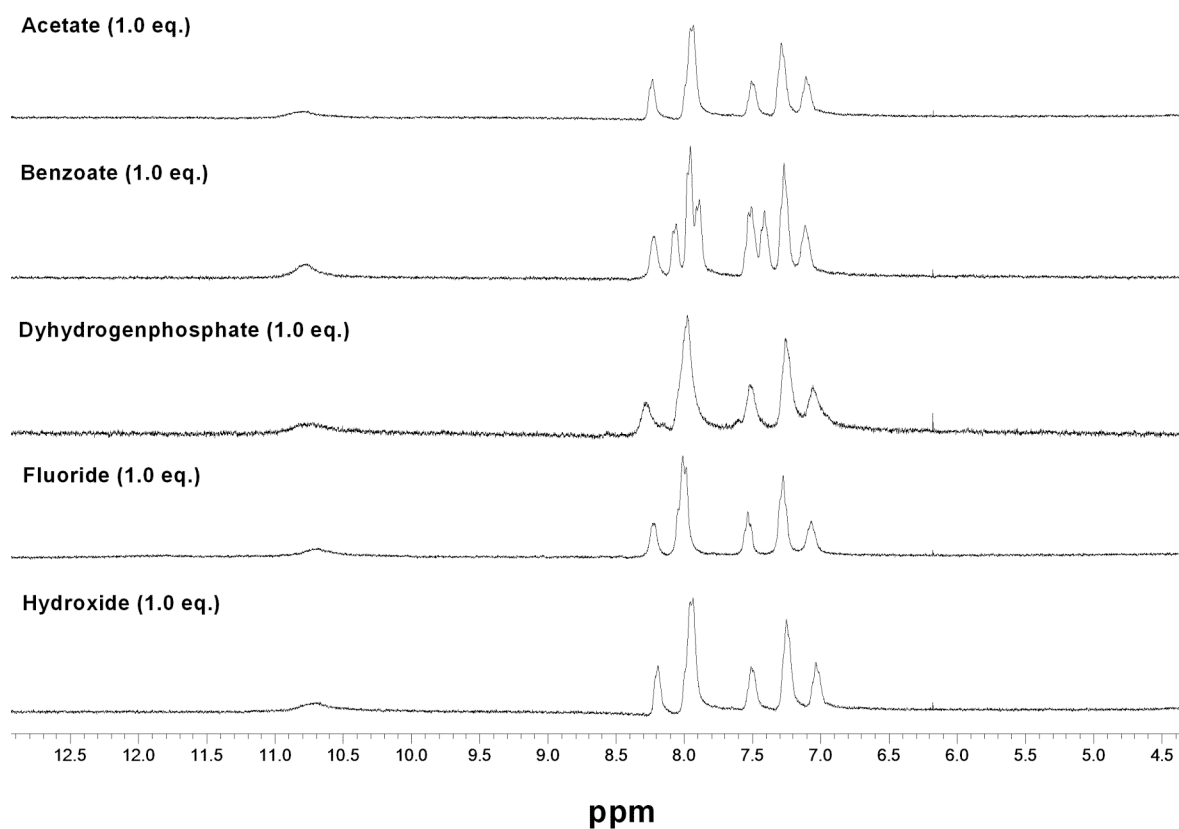

**Figure S13**  $^1\text{H}$  NMR spectra (selected region) of  $0.01 \text{ mol. dm}^{-3}$  solution of **2** with one equivalent of tetrabutylammonium acetate, benzoate, dihydrogenphosphate, fluoride and hydroxide in  $\text{DMSO-}d_6$ -0.5% water as solvent.

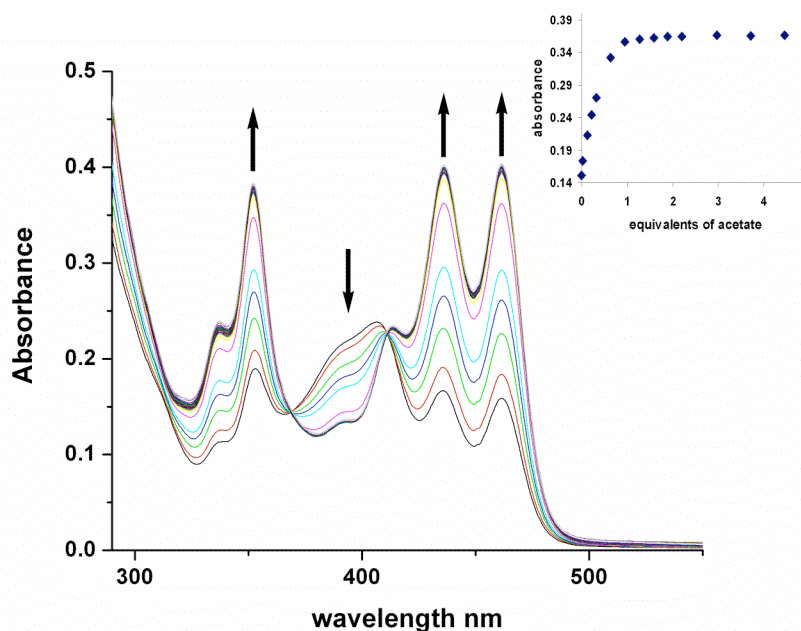

**Figure S14** UV-vis absorption spectrophotometric titration of compound **2** with tetrabutylammonium acetate in DMSO at  $25 \text{ }^\circ\text{C}$ . Inset: variation of absorbance at 440 nm vs. equivalents of acetate.

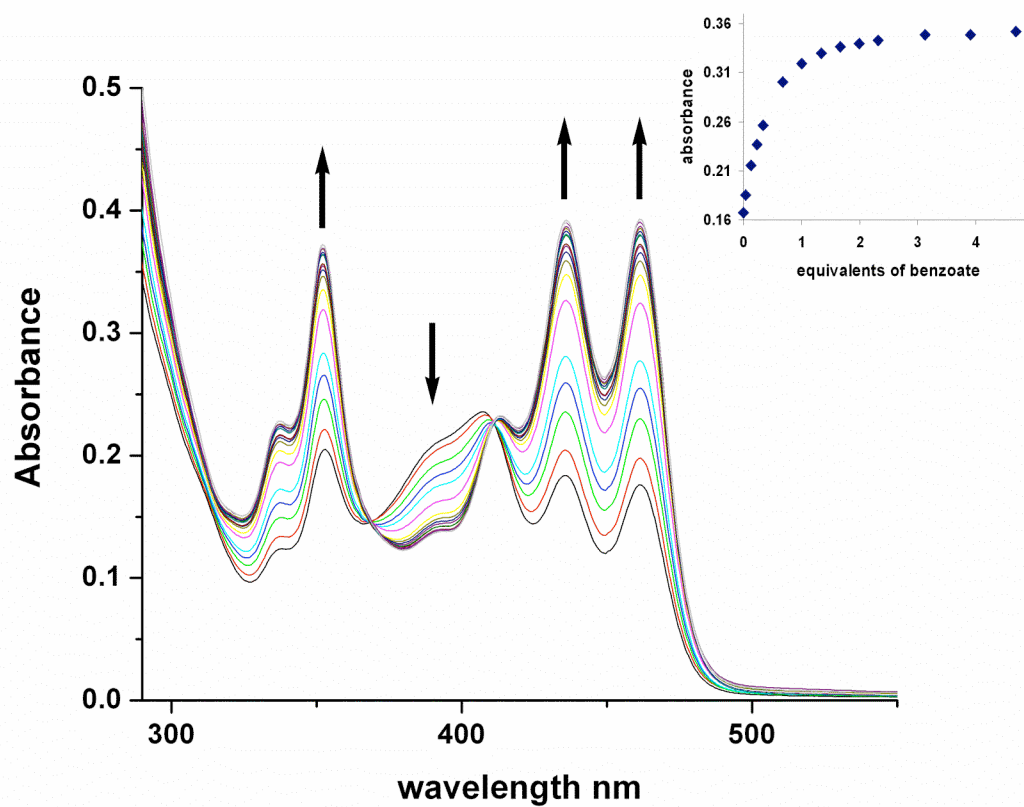

**Figure S15** UV-vis spectrophotometric titrations of **2** with tetrabutylammonium benzoate.

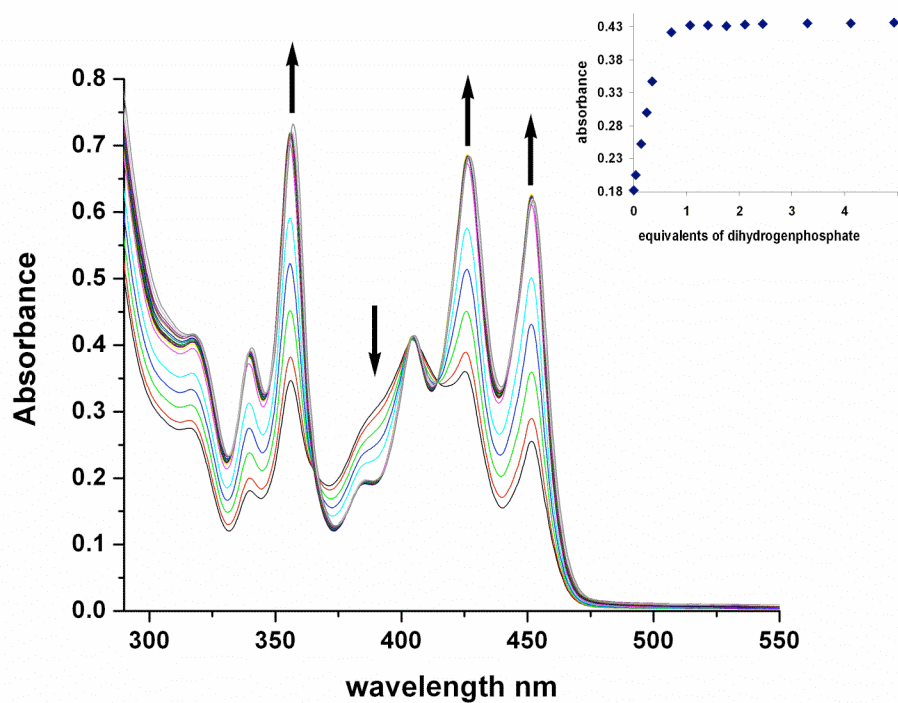

**Figure S16** UV-vis spectrophotometric titrations of **2** with tetrabutylammonium dihydrogenphosphate.

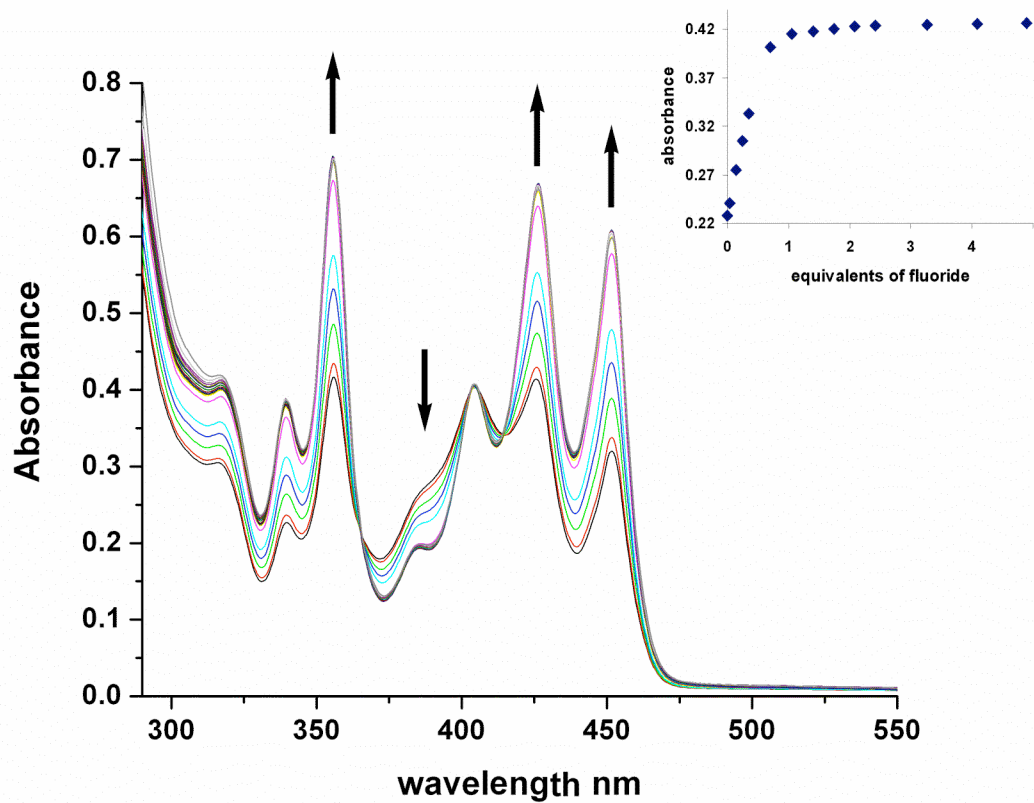

Figure S17 UV-vis spectrophotometric titrations of **2** with tetrabutylammonium fluoride.

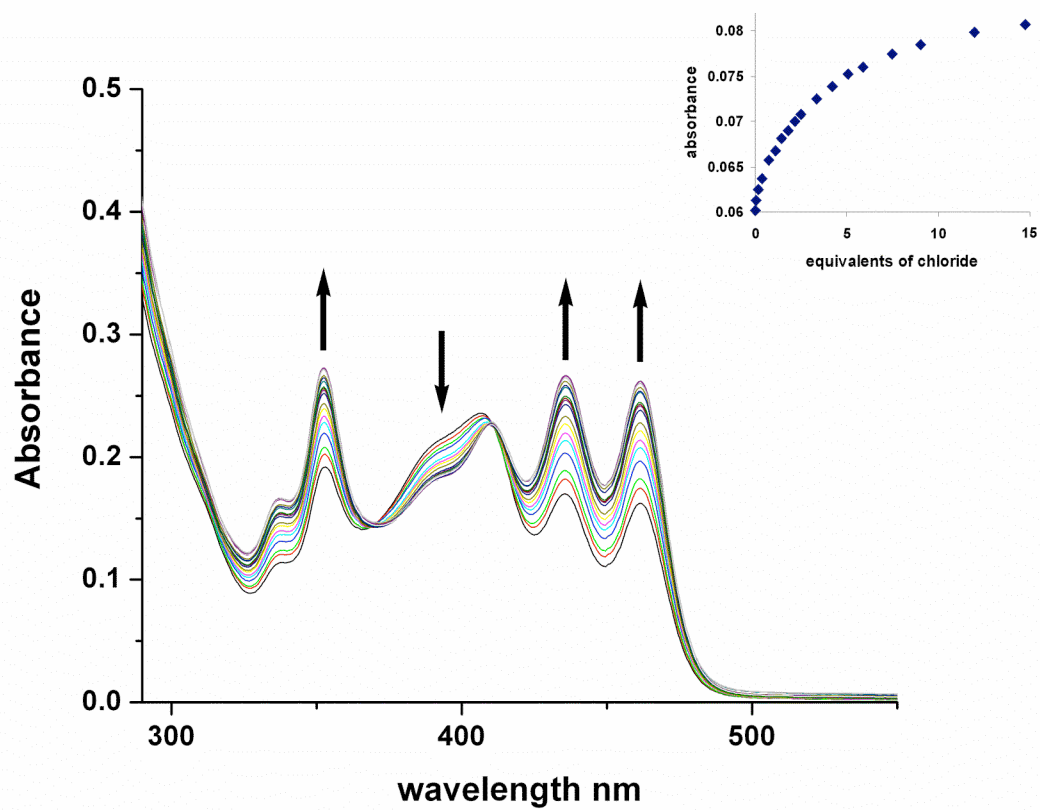

Figure S18 UV-vis spectrophotometric titrations of **2** with tetrabutylammonium chloride.

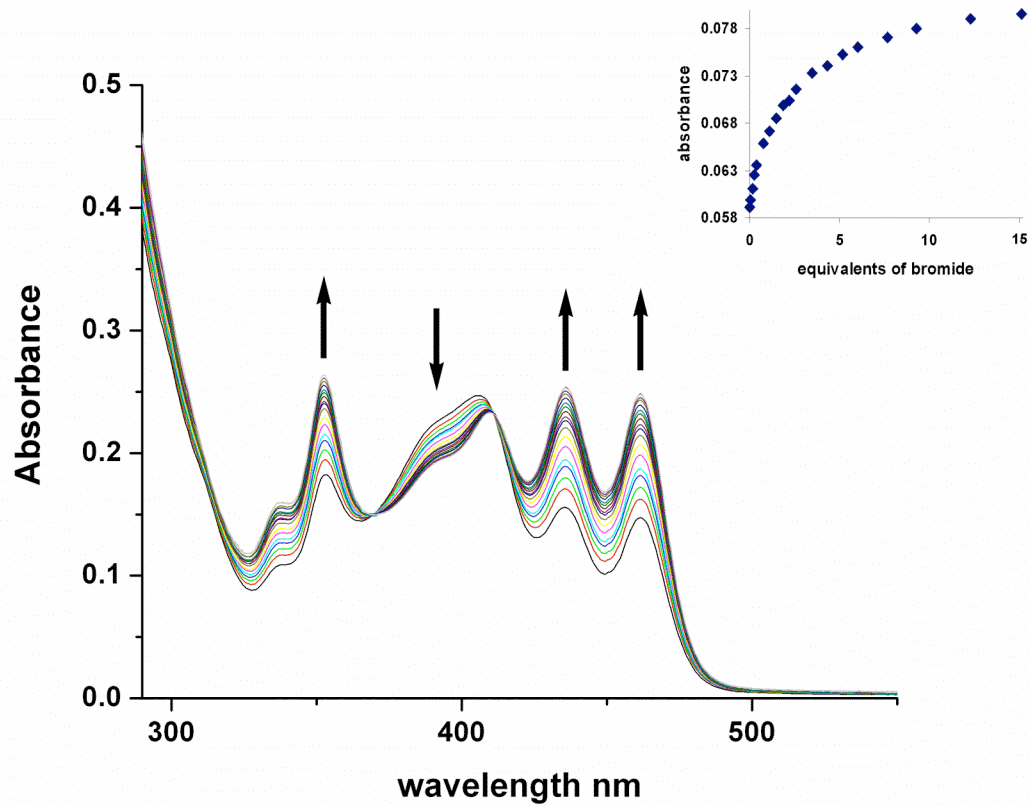

**Figure S19** UV-vis spectrophotometric titrations of **2** with tetrabutylammonium bromide.

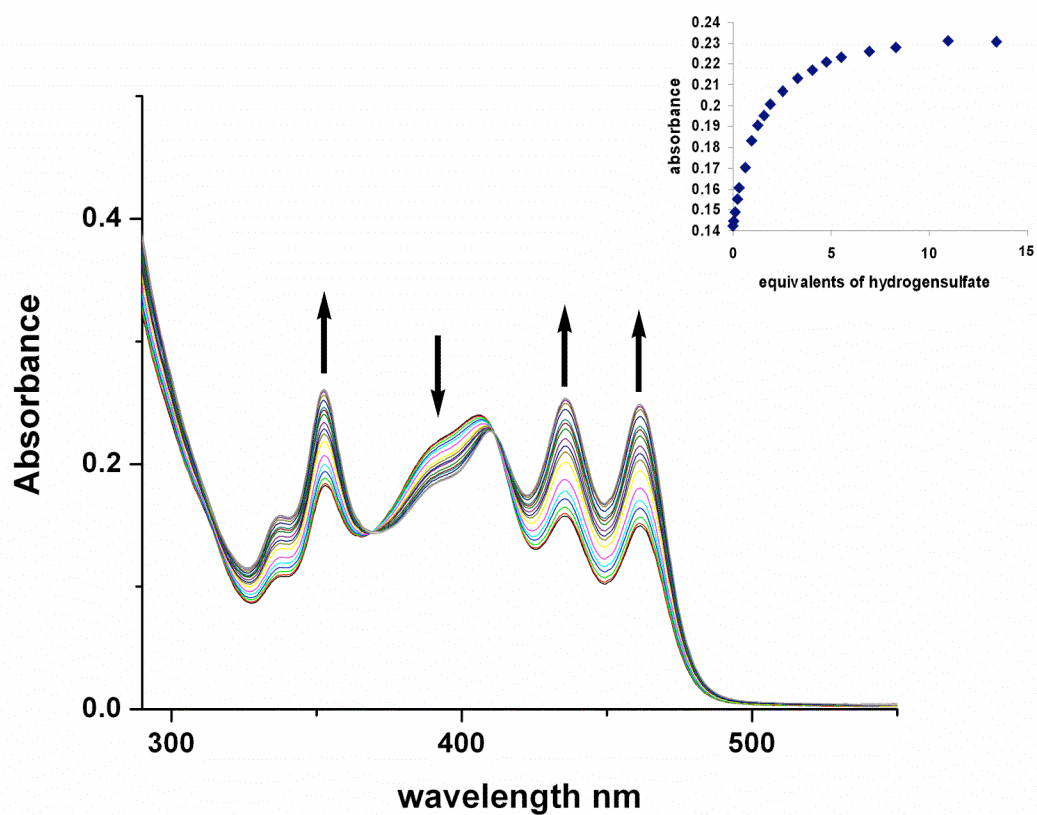

**Figure S20** UV-vis spectrophotometric titrations of **2** with tetrabutylammonium hydrogensulfate.

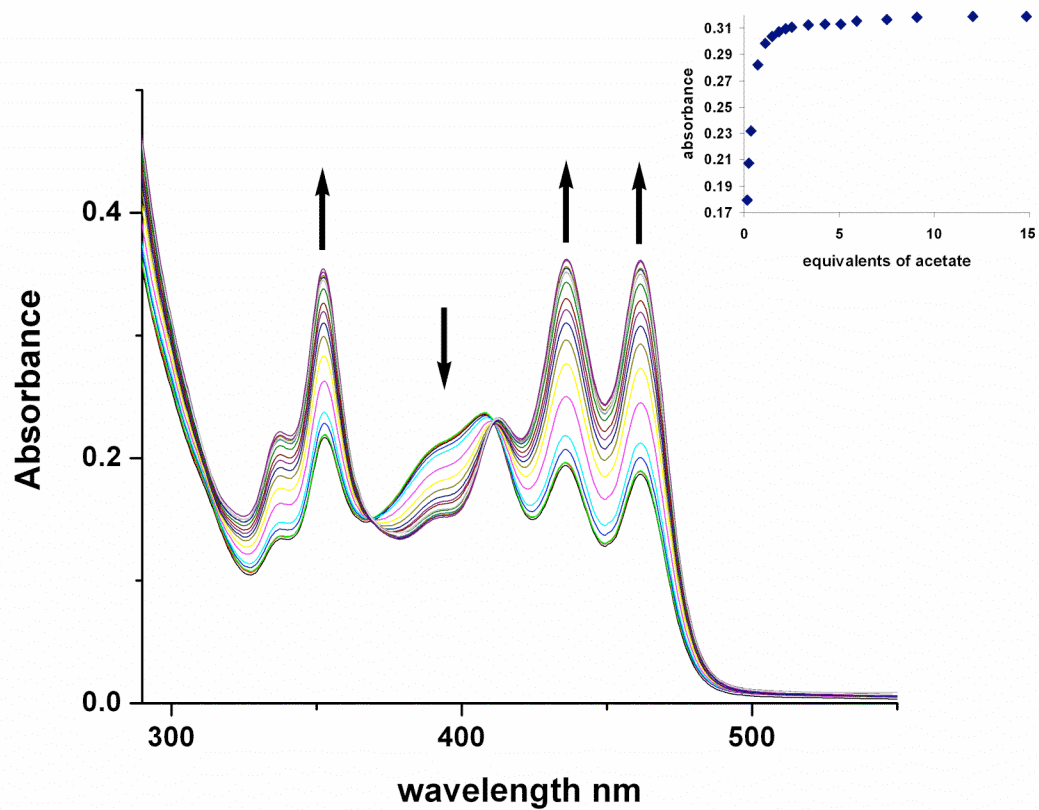

Figure S21 UV-vis spectrophotometric titrations of **3** with tetrabutylammonium acetate.

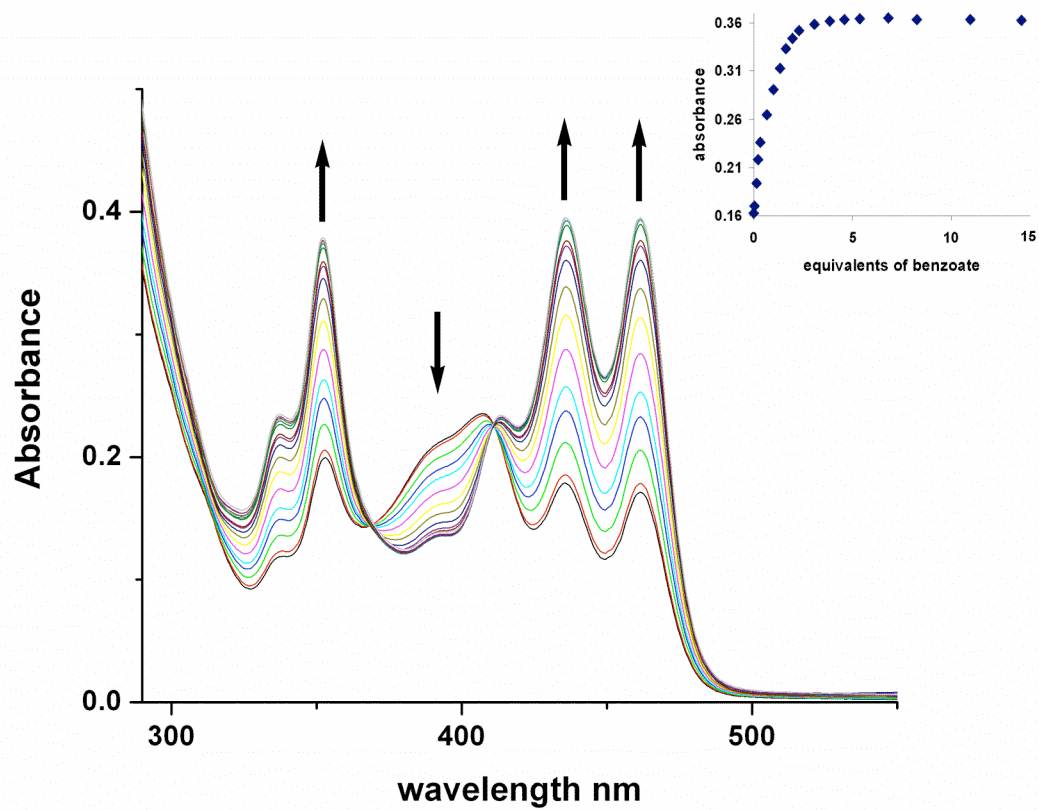

Figure S22 UV-vis spectrophotometric titrations of **3** with tetrabutylammonium benzoate.

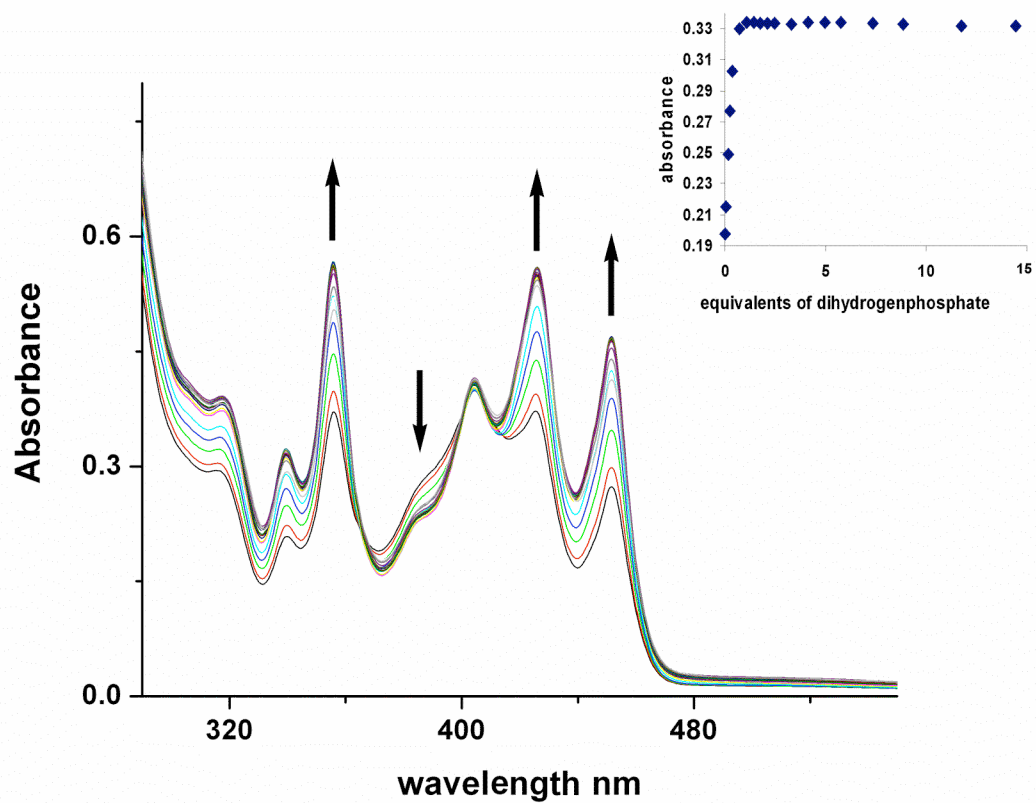

**Figure S23** UV-vis spectrophotometric titrations of **3** with tetrabutylammonium dihydrogenphosphate.

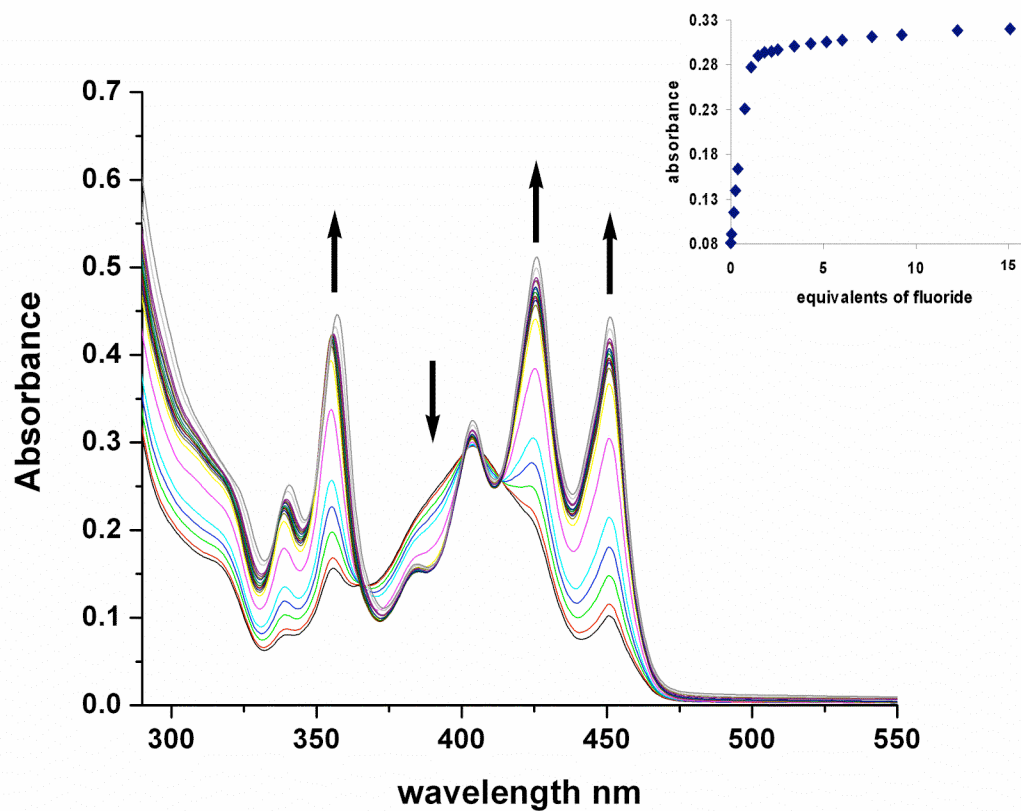

**Figure S24** UV-vis spectrophotometric titrations of **3** with tetrabutylammonium fluoride.

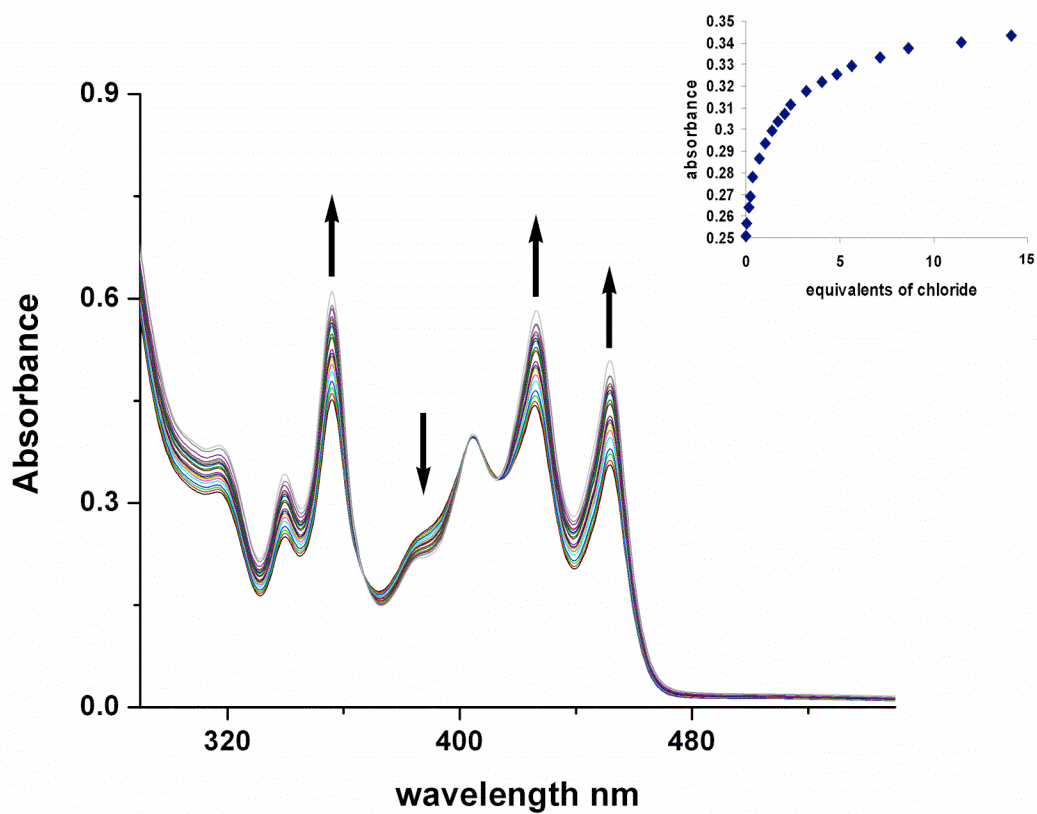

Figure S25 UV-vis spectrophotometric titrations of **3** with tetrabutylammonium chloride.

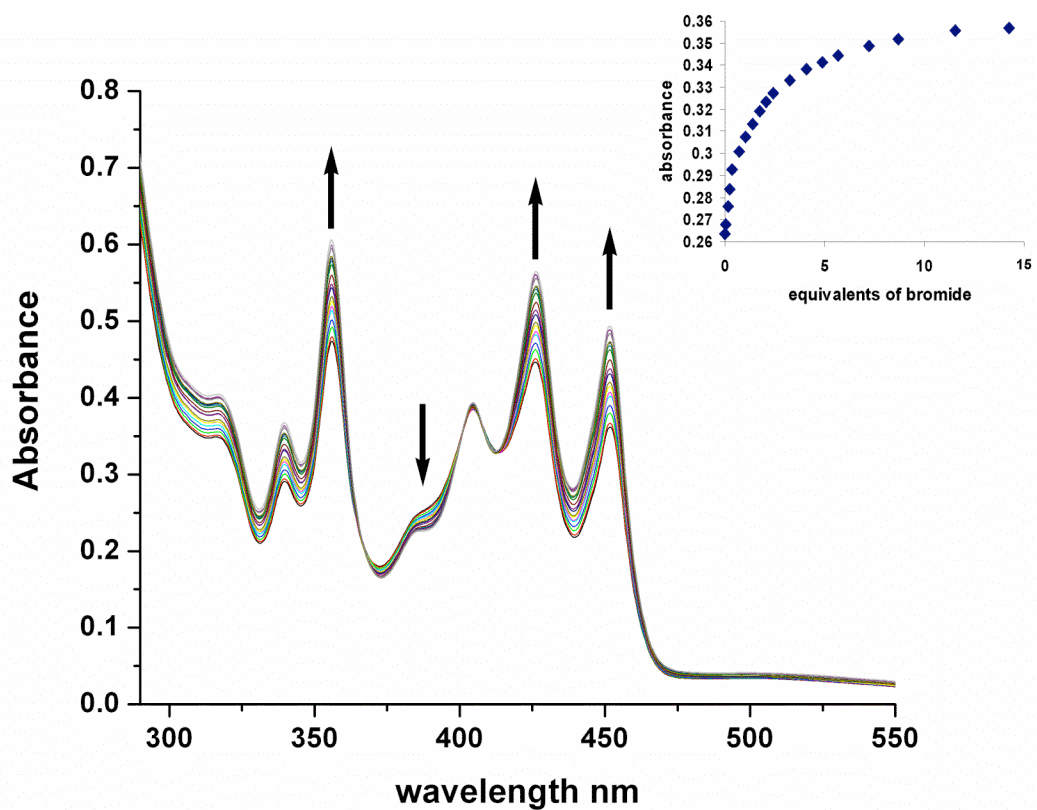

Figure S26 UV-vis spectrophotometric titrations of **3** with tetrabutylammonium bromide.



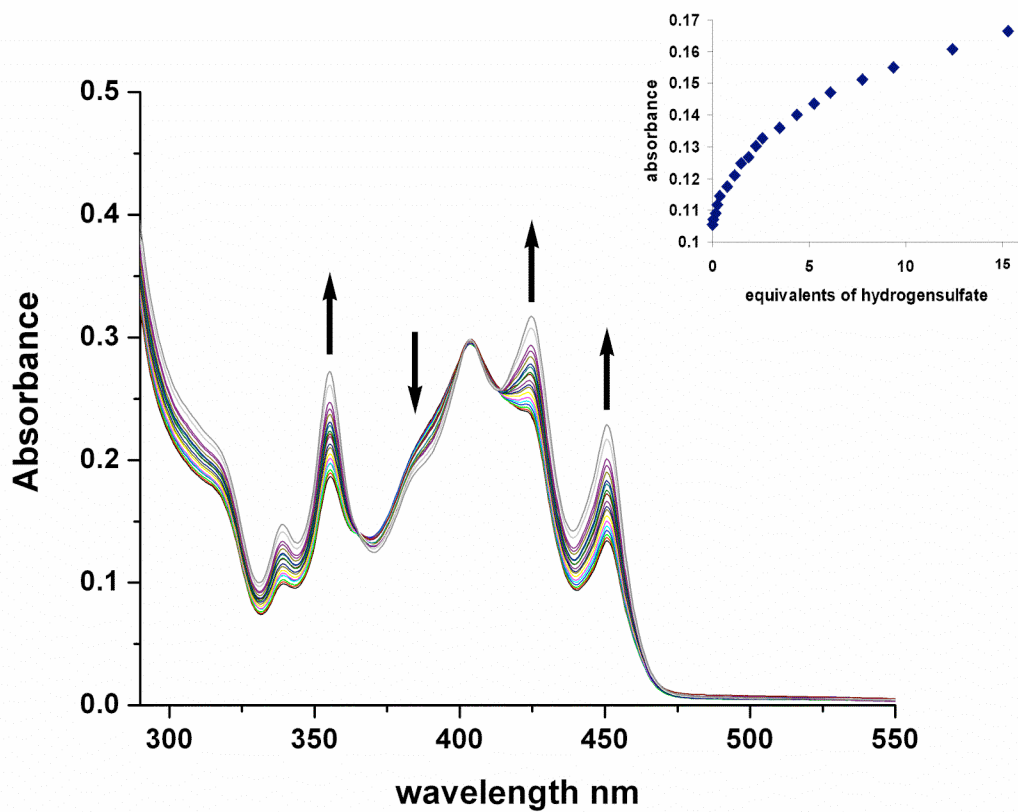

**Figure S27** UV-vis spectrophotometric titrations of **3** with tetrabutylammonium hydrogensulfate.

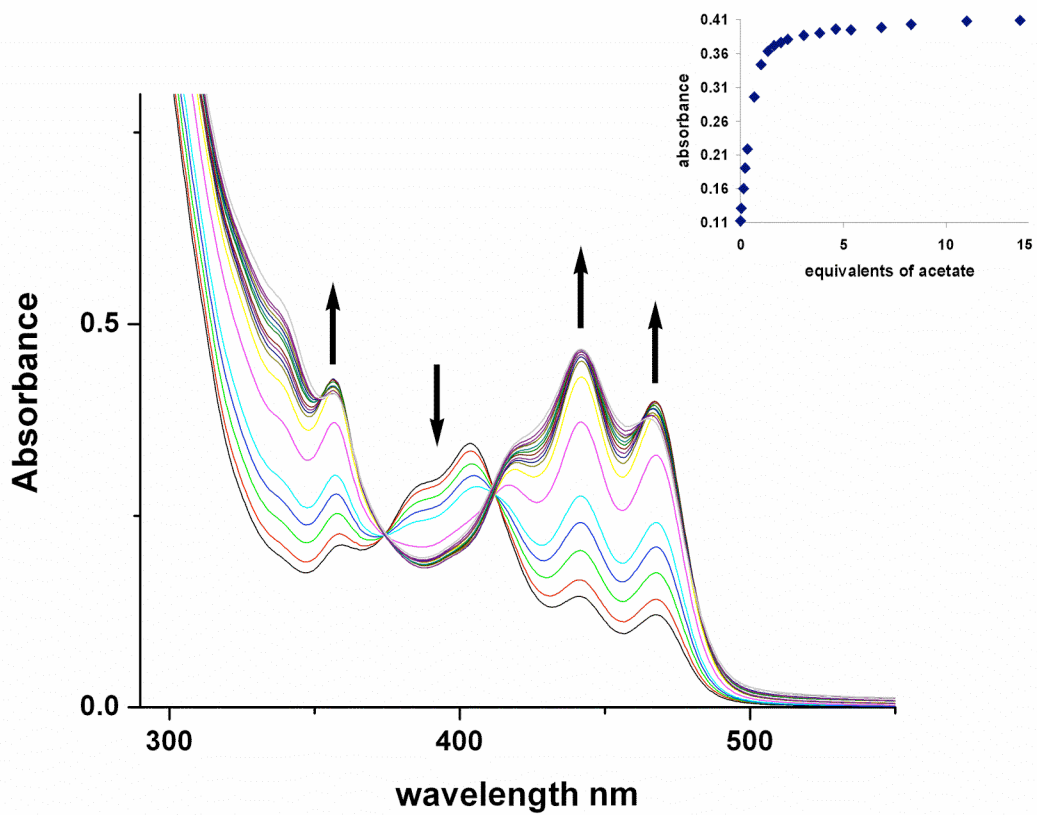

**Figure S28** UV-vis spectrophotometric titrations of **4** with tetrabutylammonium acetate.

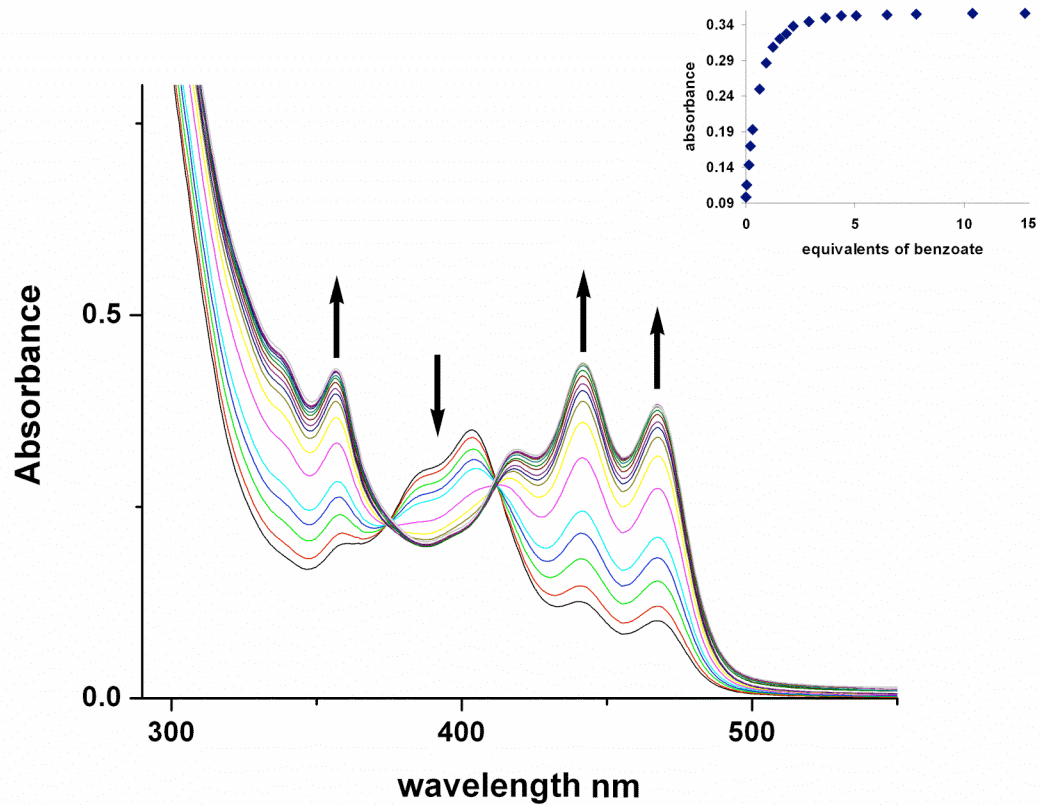

**Figure S29** UV-vis spectrophotometric titrations of 4 with tetrabutylammonium benzoate.

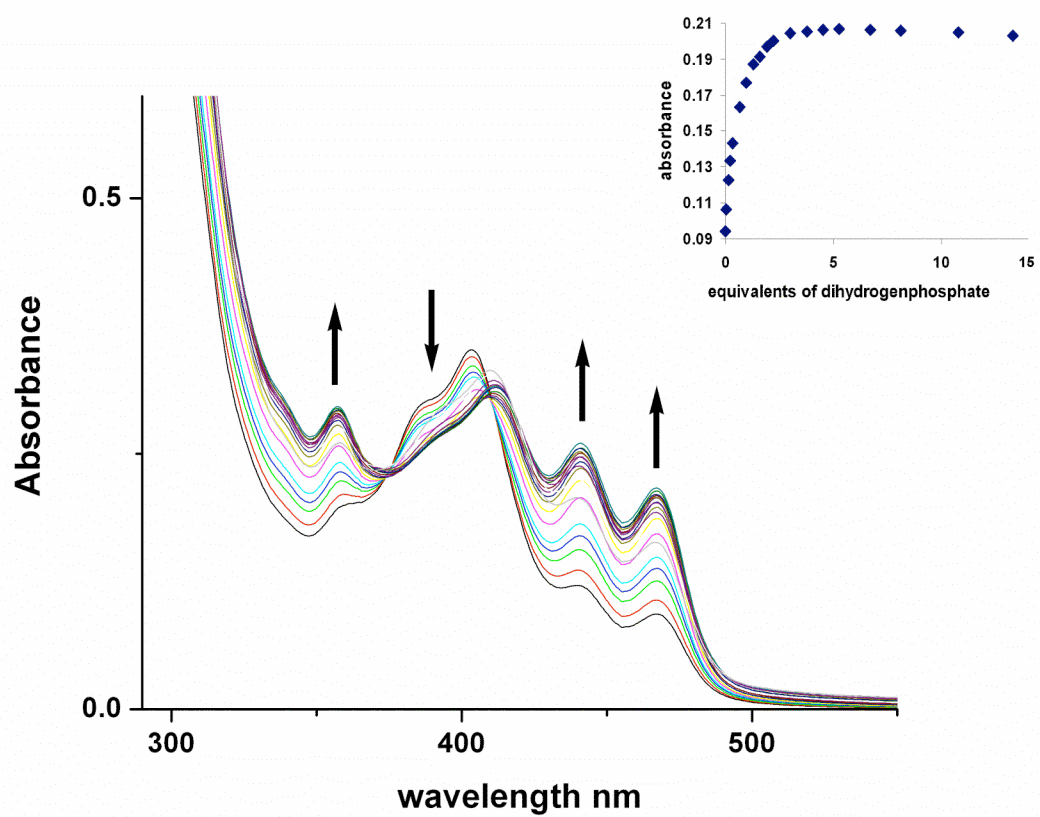

**Figure S30** UV-vis spectrophotometric titrations of 4 with tetrabutylammonium dihydrogenphosphate.

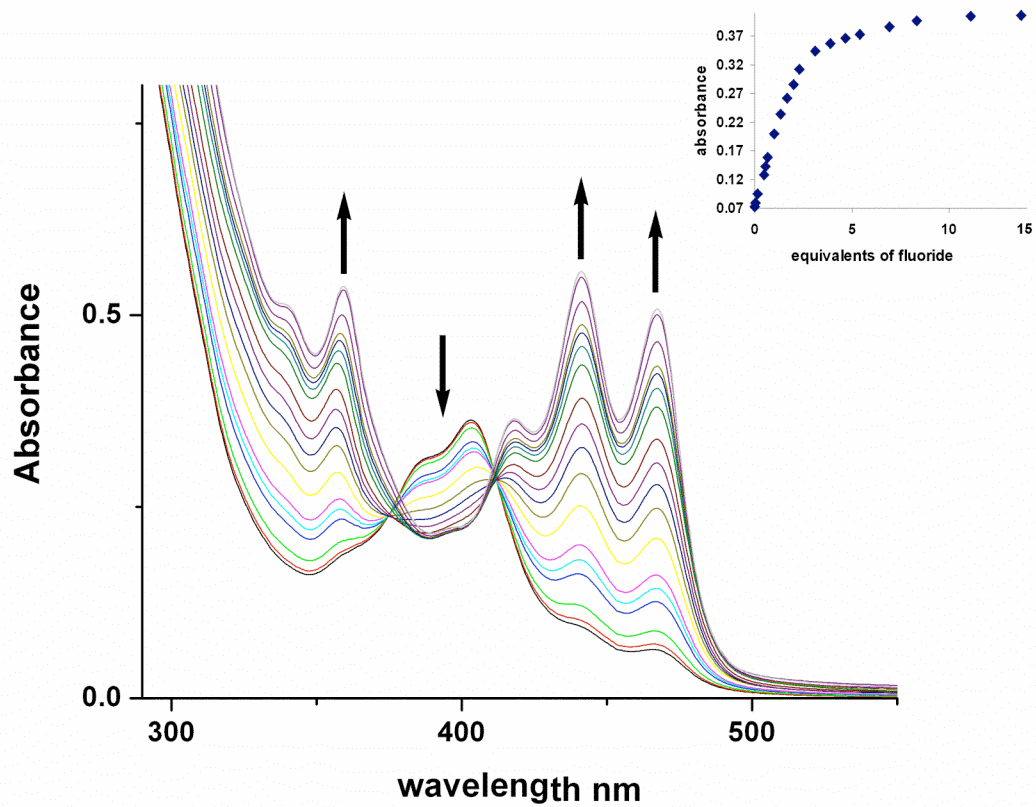

Figure S31 UV-vis spectrophotometric titrations of 4 with tetrabutylammonium fluoride.

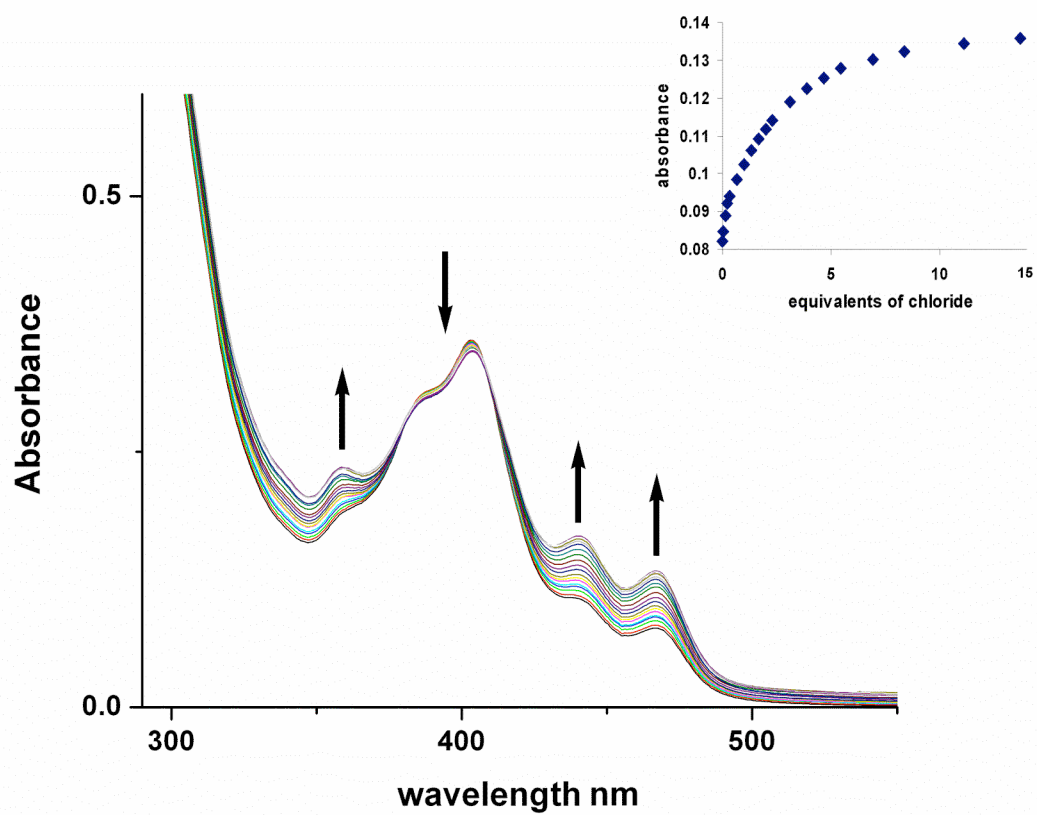

Figure S32 UV-vis spectrophotometric titrations of 4 with tetrabutylammonium chloride.

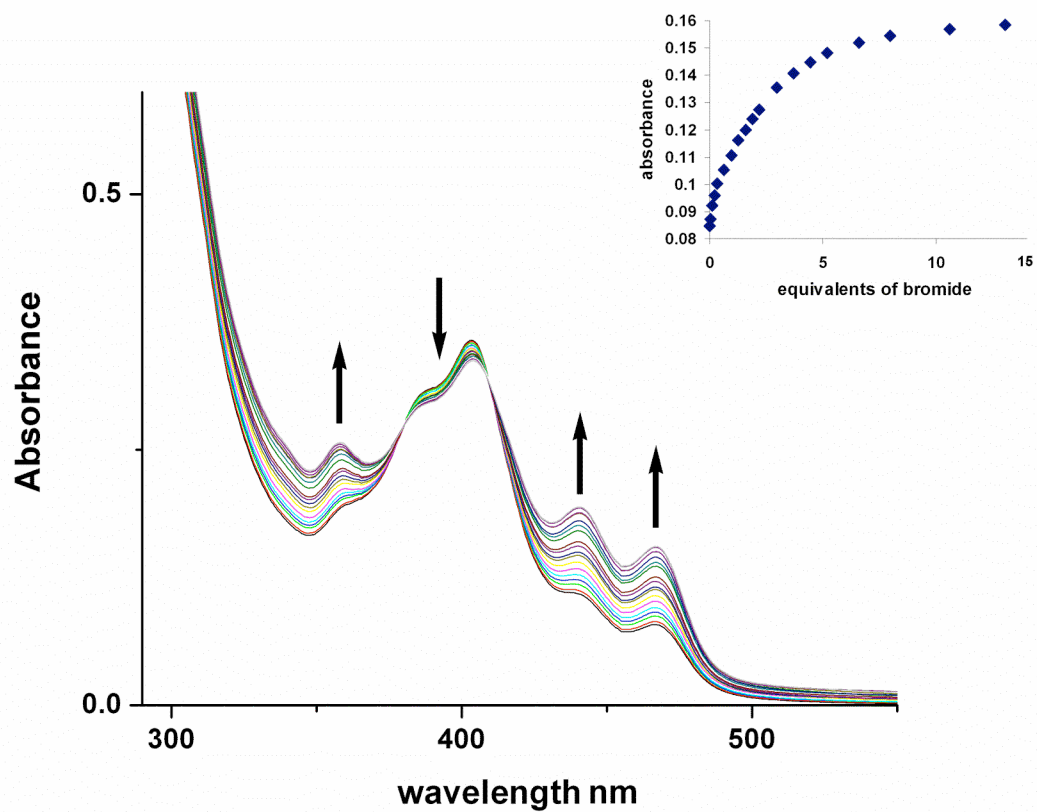

**Figure S33** UV-vis spectrophotometric titrations of 4 with tetrabutylammonium bromide.

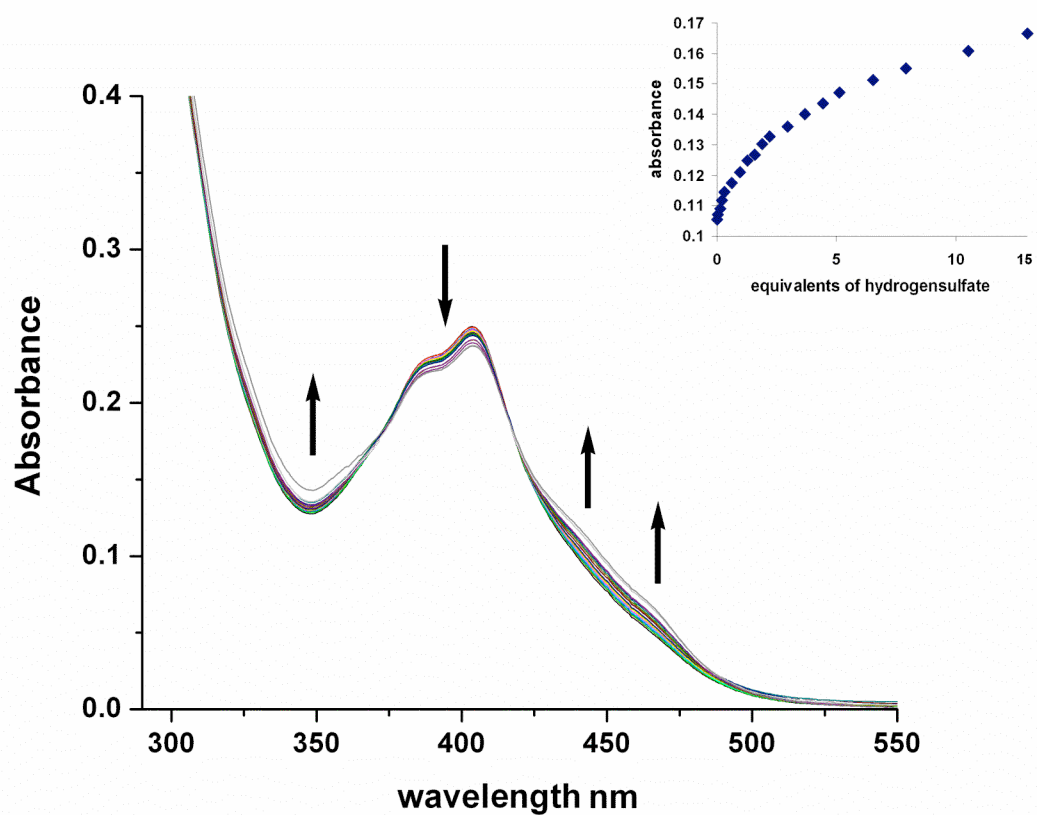

**Figure S34** UV-vis spectrophotometric titrations of 4 with tetrabutylammonium hydrogensulfate.

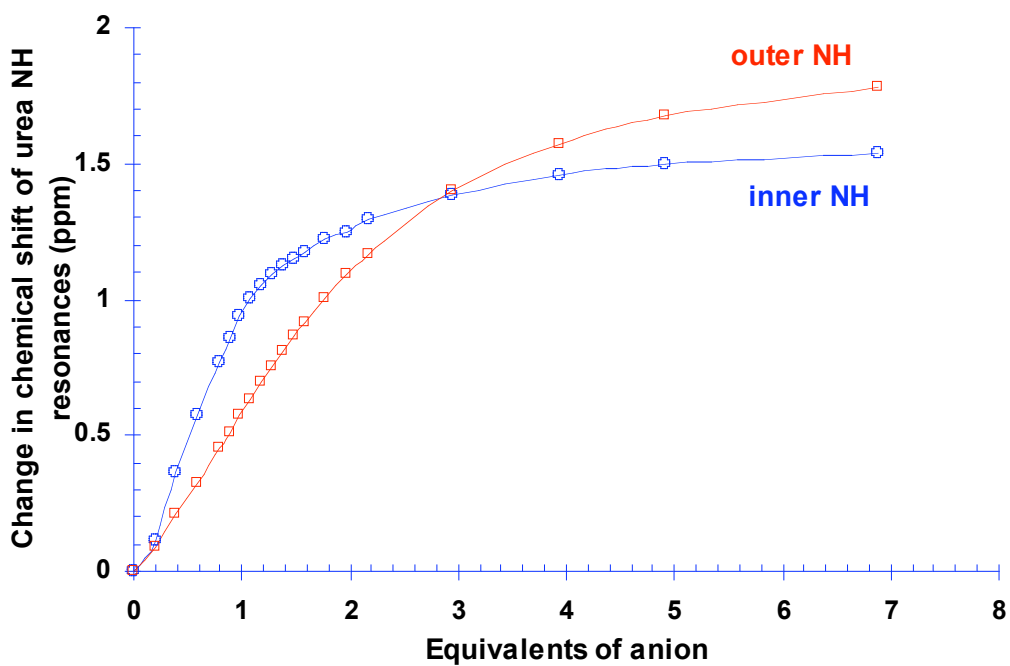

**Figure S35** Shifts of the NH groups of compound **3** upon the addition of tetrabutylammonium benzoate in DMSO- $d_6$ -0.5% water.

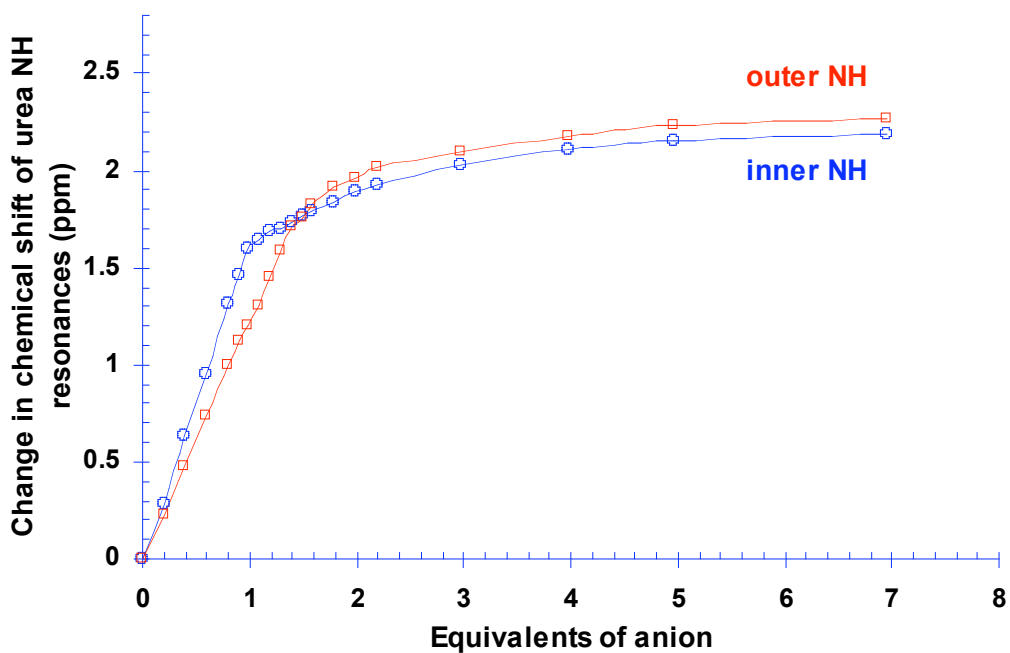

**Figure S36** Shifts of the NH groups of compound **3** upon the addition of tetrabutylammonium dihydrogenphosphate in DMSO- $d_6$ -0.5% water.

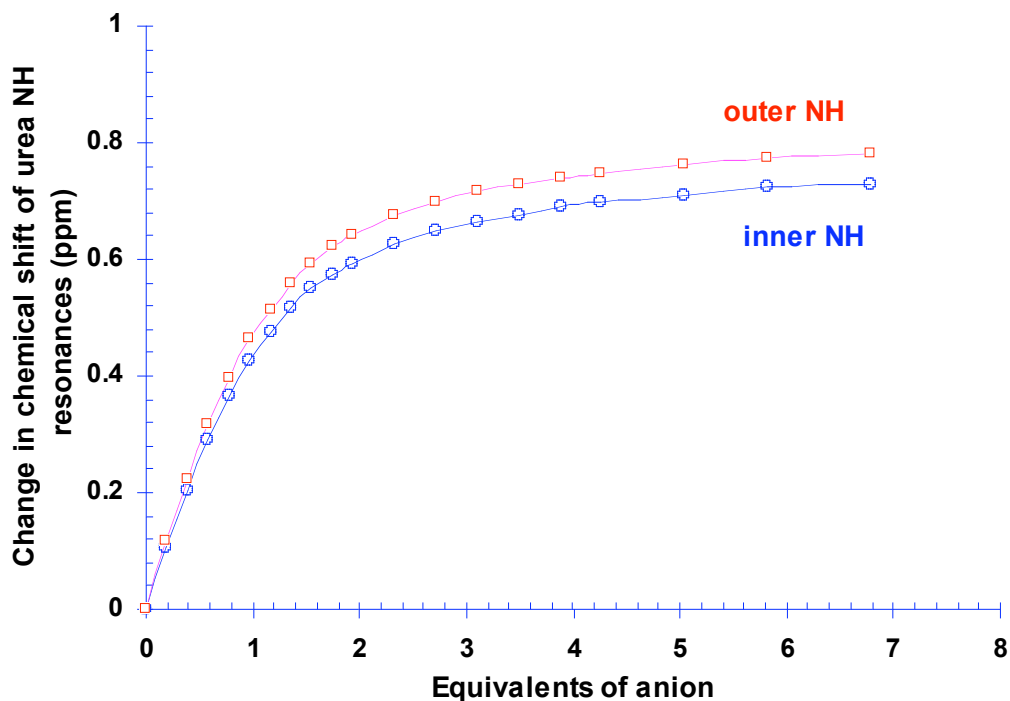

**Figure S37** Shifts of the NH groups of compound **3** upon the addition of tetrabutylammonium chloride in DMSO- $d_6$ -0.5% water.

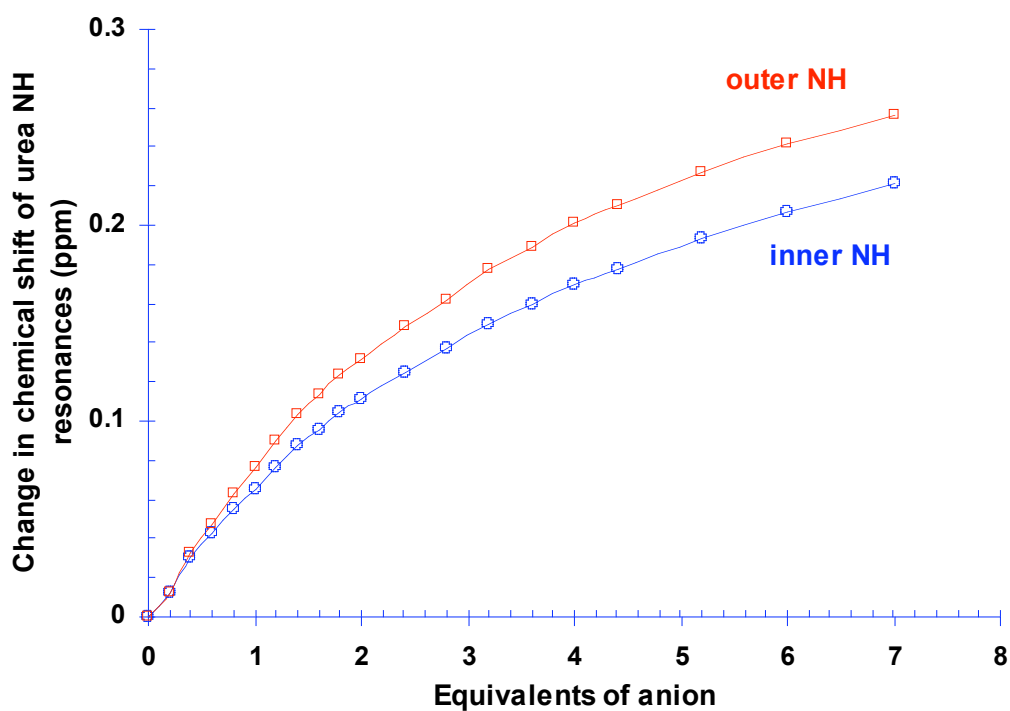

**Figure S38** Shifts of the NH groups of compound **3** upon the addition of tetrabutylammonium bromide in DMSO- $d_6$ -0.5% water.

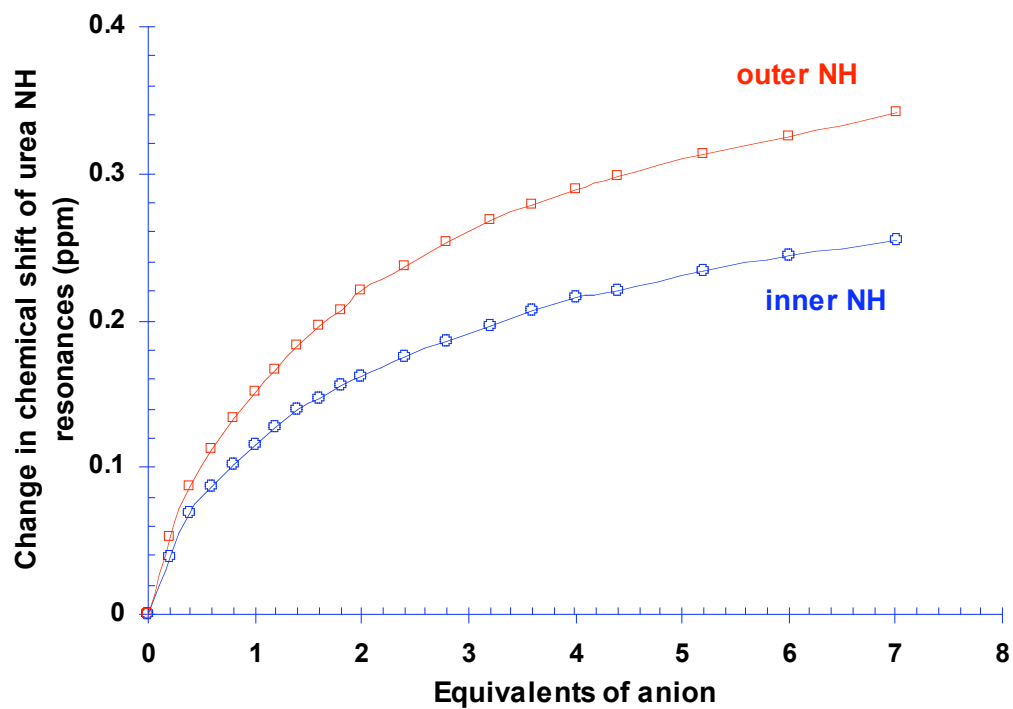

**Figure S39** Shifts of the NH groups of compound **3** upon the addition of tetrabutylammonium bromide in DMSO- $d_6$ -0.5% water.

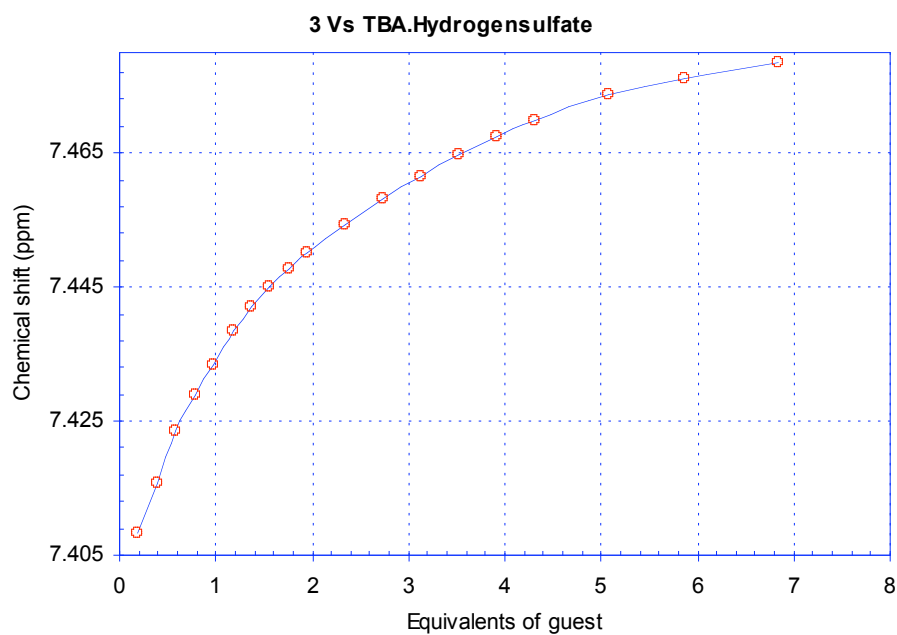

**Figure S40**  $^1\text{H}$  NMR titration curve of **3** with tetrabutylammonium hydrogensulfate.

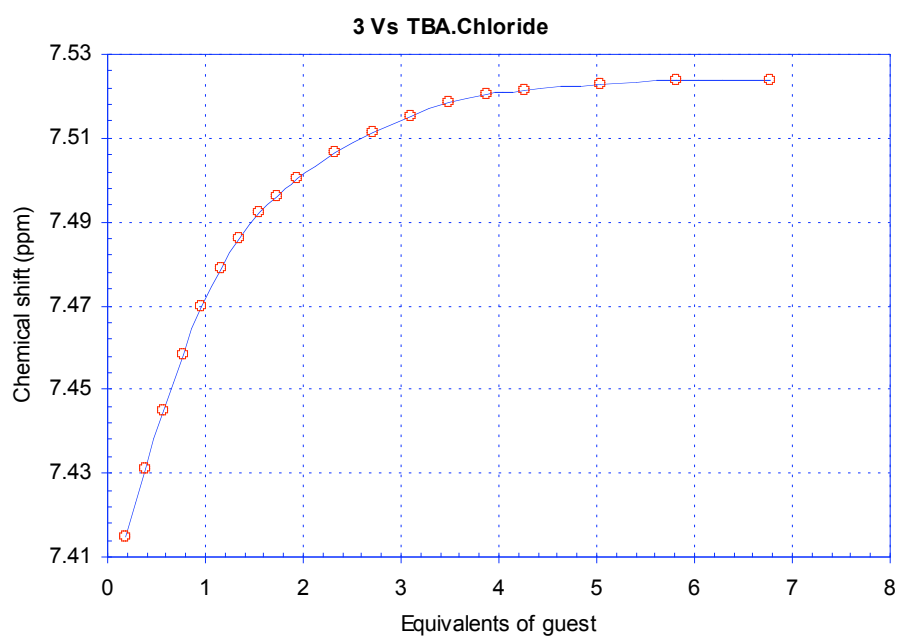

**Figure S41**  $^1\text{H}$  NMR titration curve of **3** with tetrabutylammonium chloride.



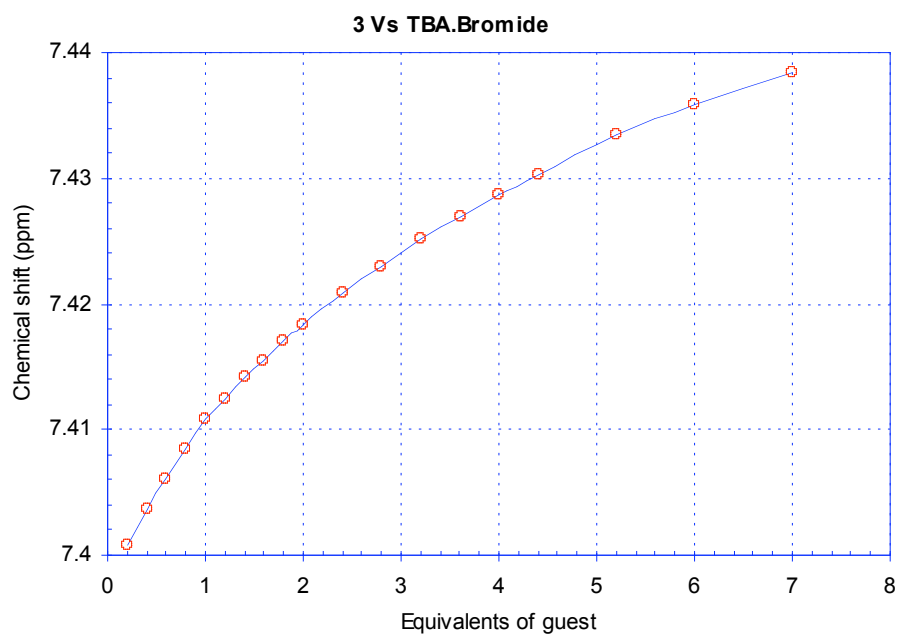

**Figure S42**  $^1\text{H}$  NMR titration curve of **3** with tetrabutylammonium bromide.

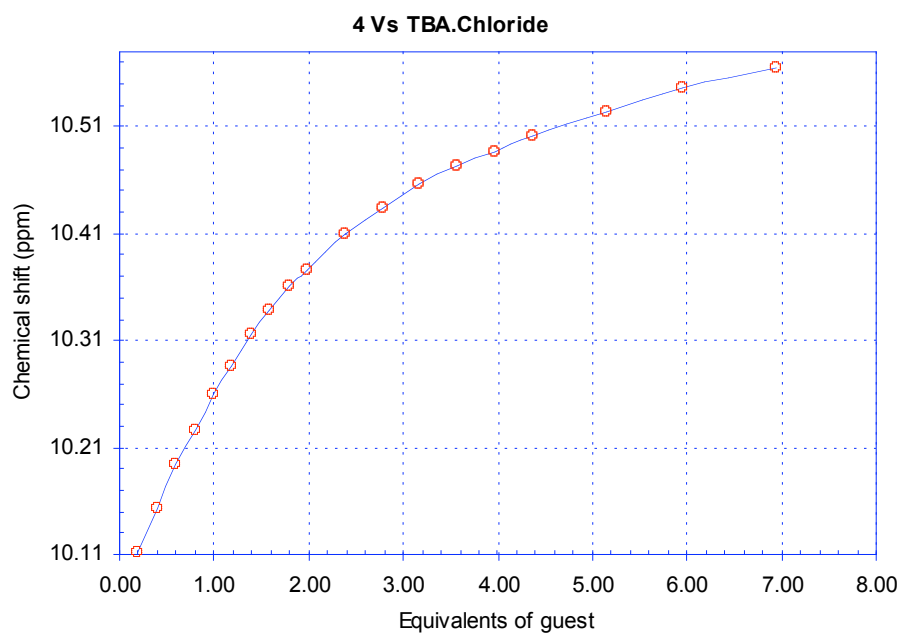

**Figure S43**  $^1\text{H}$  NMR titration curve of **4** with tetrabutylammonium chloride.

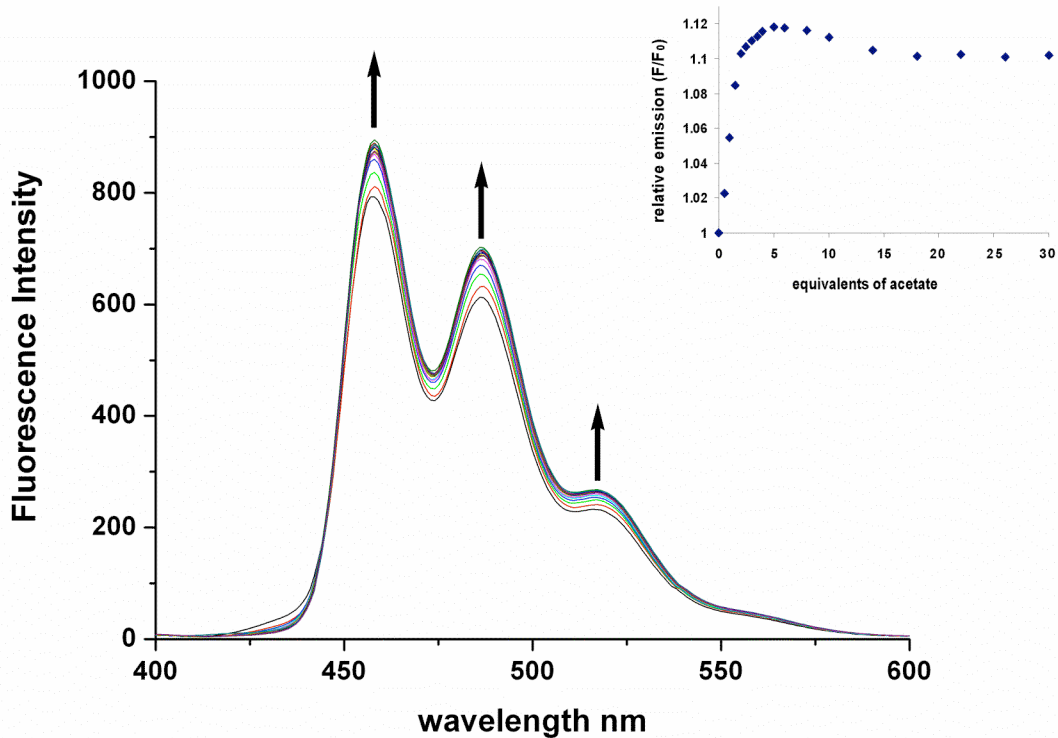

**Figure S44** Fluorescence of **3** in MeCN/DMSO (96/4 v/v) upon the addition of tetrabutylammonium acetate.

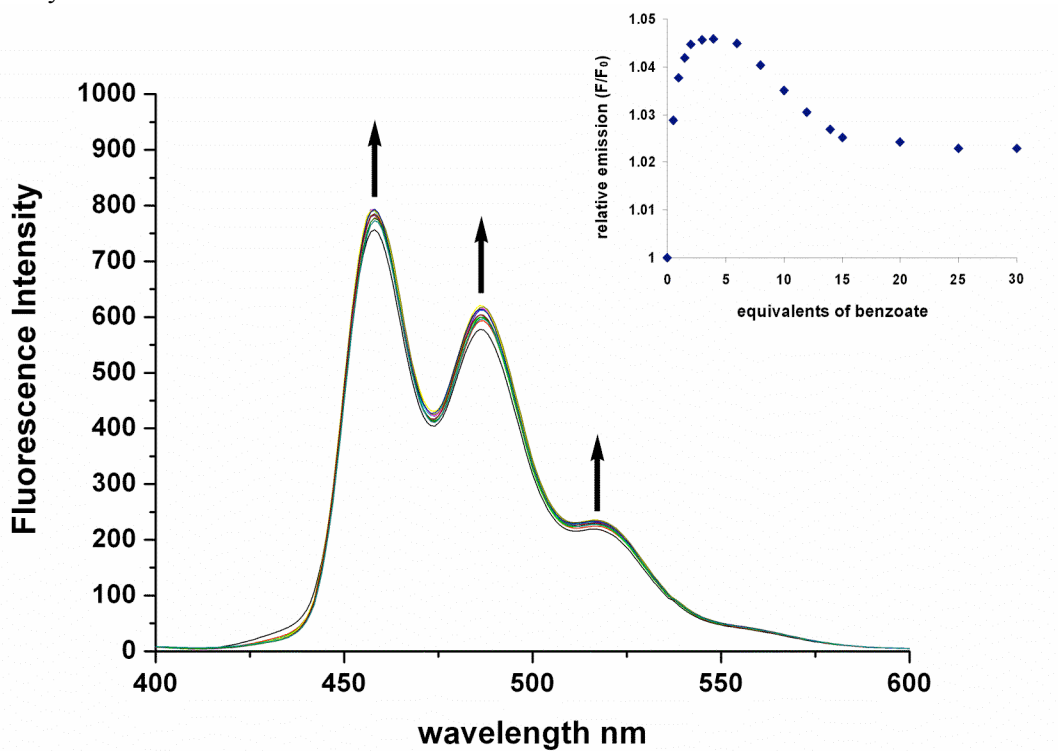

**Figure S45** Fluorescence of **3** in MeCN/DMSO (96/4 v/v) upon the addition of tetrabutylammonium benzoate.

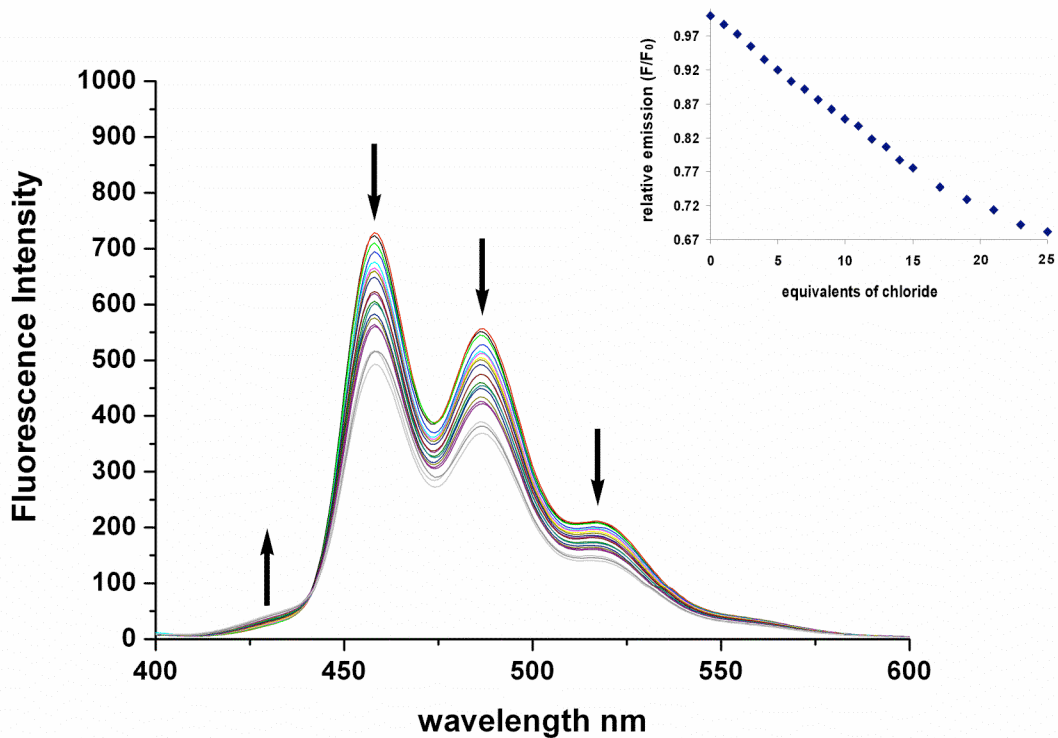

**Figure S46** Fluorescence of **3** in MeCN/DMSO (96/4 v/v) upon the addition of tetrabutylammonium chloride.

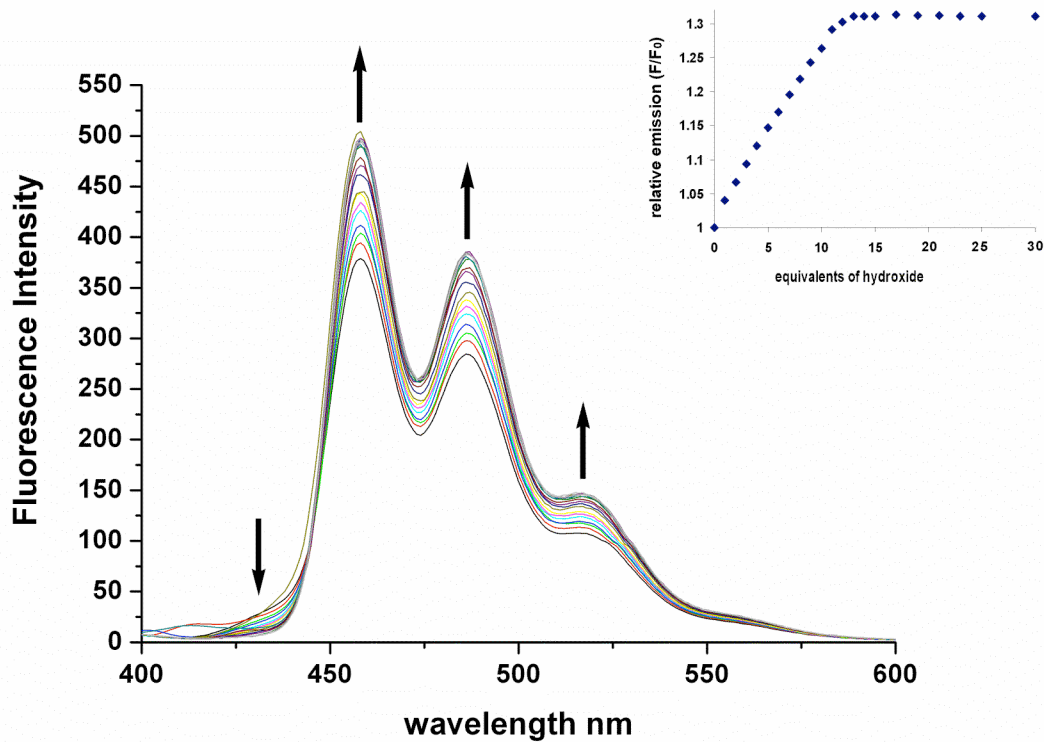

**Figure S47** Fluorescence of **3** in MeCN/DMSO (96/4 v/v) upon the addition of tetrabutylammonium hydroxide.
